# Supplementary material
Source: PubMed Central journal article supplement (PMC6152910)
Supplement: NIHMS78644-supplement-Supplementary_information.pdf [file NIHMS78644-supplement-Supplementary_information.pdf]

# 1 **Supplementary information**

2

## 3 **S1. Calibration information**

4

5 **Note:** Last universal common ancestor (LUCA)

6 **Locality and Stratigraphy level:** Strelley Pool Formation, Western Australia

7 **Minimum age:** 3347 Ma (3350 Ma  $\pm$  3 Myr<sup>1</sup>)

8 **Maximum age:** 4520 Ma (4510 Ma  $\pm$  10 Myr<sup>2,3</sup>)

### 9 **Phylogenetic justification:**

10 There are numerous reports of fossils from early Archaean sediments, however, determining a  
11 biotic origin for these records is difficult. Generally, there is a dearth of strata representative of  
12 early Earth history; those strata that are representative and are available for sampling have often  
13 been heavily altered by metamorphic processes. The oldest rocks available include, the Itsaq  
14 Gneiss, Isua, Greenland; the Barberton Greenstone Belt, South Africa; and the Pilbara Craton,  
15 Australia. These contain the oldest possible remains of life. At >3.7 Ga the Itsaq Gneiss  
16 contains putative fossils<sup>4,5</sup>, stromatolites<sup>6</sup>, carbon isotopes<sup>7</sup> and graphite inclusions<sup>8,9</sup>.  
17 However, each of these records has been disputed, either considered unlikely to be fossils, or  
18 that the record could be produced by geological rather than biological means<sup>10-12</sup> i.e. isotope  
19 ratios and graphite inclusions, synthesized by Fisher-Tropsch type (FTT) reactions<sup>13,14</sup>.  
20 At Pilbara, there are claims of isotopic evidence for sulphur bacteria<sup>15</sup>, putative stromatolites  
21 and the infamous microfossils from the Apex Chert<sup>16</sup>, as well as other microfossil reports<sup>17,18</sup>.  
22 None of these records is conclusive, when re-examined the Apex Chert microfossils<sup>16</sup> proved  
23 more likely to be an artefact of the reorganization of carbonaceous matter<sup>19,20</sup>. Likewise, the  
24 other microfossils have not been rigorously examined and so do not provide conclusive  
25 evidence of life. The sulphur isotope data<sup>15</sup> is also uncertain as it is possible to produce the

26 same signals by non-biological means<sup>21</sup>. Microfossils have also been reported from  
27 Barberton<sup>22-25</sup> but their biogenesis has been disputed.

28 Putative stromatolites are widespread in ancient sediments in both Barberton and Pilbara<sup>26-31</sup>  
29 but their formation is not exclusively tied to the presence of biological processes and the oldest  
30 stromatolites are most often found without any accompanying microbial fossils. Their  
31 abiogenic synthesis has been replicated laboratory conditions<sup>33</sup> and so they provide an  
32 uncertain record. Therefore, we must look for more conclusive evidence of life, that which has  
33 been examined from several angles. More rigorous analysis has been undertaken of fossils from  
34 slightly younger sites. For example, a sample of fossils from the ~3.2 Ga Moodies Group,  
35 Barberton, were described using criteria which looked at a rigorous range of criteria: fossil  
36 placement within the rock; their ultrastructure; their composition; and their size<sup>34</sup>. Some of  
37 these small organic walled fossils are actually very large (up to 300 microns diameter)<sup>34</sup>; sizes  
38 which are unknown amongst archaea<sup>35</sup>. Older remains from the Strelley Pool Formation,  
39 Pilbara, Western Australia<sup>36,37</sup> have also been examined based on a set of criteria similar to  
40 those used by Javaux and colleagues. These fossils have a complex ultrastructure and acid  
41 resistant walls that survive being digested out of the rock. Additionally, it should be noted that  
42 the organic carbon signature shows that the fossils were not emplaced into the rock at a later  
43 stage, a problem with many early records. Some of these fossils are also present in multi-cell  
44 chains. These are not known to form in abiotic ways and, hence, it can be concluded that these  
45 structures are biological in origin. The Strelley Pool Formation also contains a host of other  
46 evidence for life. These include other microfossils both alone<sup>38</sup> and in association with pyrite  
47 crystals<sup>39</sup>, possibly indicating some kind of sulphur metabolism backed up a previous study  
48 showing sulphur metabolism<sup>40</sup>, as well as microbial mats<sup>41</sup>, and stromatolites, which have been  
49 more intensely studied to give credence to their biological affinity<sup>42</sup>. What is more the  
50 microfossils have been shown to possess specific  $\delta^{13}\text{C}_{\text{org}}$  signatures that are correlated

51 specifically to the microfossils<sup>43</sup>. Overall these show a diverse community<sup>44</sup>. Although alone  
52 these would not provide a suitable record, in accordance with the well-studied fossils<sup>36</sup> they  
53 provide a robust calibration with which to constrain LUCA.

#### 54 **Age justification:**

55 **Hard minimum:** The Strelley Pool Formation is located in North Eastern Australia and is part  
56 of the larger Pilbara Craton. The stratigraphic position of this formation (also known as the  
57 Strelley Pool Chert) has been contentious but it is now argued to form a layer between the  
58 Warawoona and Kelly groups<sup>45</sup>. The formation is dated to 3.426-3.350 Ga<sup>45</sup>, with the minimum  
59 age (3.350 Ga  $\pm$  0.003 Gyr) based on a volcanoclastic tuff, at the base of the overlying Euro  
60 Basalt<sup>1</sup> in the Kelly Group. Hence our minimum age constraint is 3.347 Ga.

61 **Soft maximum:** We can use the Moon-forming impact as a maximum constraint; there is no  
62 other event or date of significance which can be used in its place. This devastating event would  
63 have sterilised the Earth, hence any life now present on the planet must have evolved post-  
64 impact. It has been proposed that life would not have been able to survive the late heavy  
65 bombardment, which post-dated the Moon-forming impact, but this view has been contested  
66 as ideas of a cool early earth and an early ocean have been proposed<sup>46,47</sup>, as well as models  
67 which show that life would have been able to survive during this intense bombardment<sup>48</sup>. It is  
68 also possible that there was no late heavy bombardment because evidence of its occurrence has  
69 been found on the Moon but not on Earth<sup>49</sup>. There is some debate over the exact timing of the  
70 impact with proposed dates ranging from 4.54 Ga  $\pm$  0.01 Myr<sup>50</sup> to  $\sim$ 4.44Ga<sup>51</sup>. Some of the most  
71 recent simulations and models place the Moon-forming impact at  $\sim$ 4.47 Ga based on asteroidal  
72 meteorites and siderophile elements<sup>52,53</sup>. This concurs with estimates based on U-Pb isotopes<sup>54</sup>,  
73 Hf/W isotopes<sup>55</sup> and Rb/Sr isotopes<sup>56</sup>. We use the oldest credible date to encompass reasonable  
74 uncertainty. The oldest date of 5.4 Ga is based on the Hf-W system<sup>50,57</sup>, around which there is  
75 some debate as to the amount of signal caused by cosmogenic production of <sup>182</sup>W from <sup>181</sup>Ta<sup>58</sup>.

76 Hence, the most credible date comes from the U-Pb system. We follow other critical  
77 reviewers<sup>59</sup> in accepting Pb-Pb dating carried out on Moon rocks, yielding a date of 4.51 Ga ±  
78 10 Myr<sup>2</sup>: a date which has also recently been confirmed by reanalysis of the Apollo zircons<sup>3</sup>.  
79 Thus, our maximum constraint is 4.52 Ga.

80

81 **Node: Total group Cyanobacteria**

82 **Locality and Stratigraphy level:** Manzimnyama Banded Ironstone Formation, Fig Tree  
83 Group, Barberton, South Africa

84 **Minimum age:** 3225 Ma (3226 Ma ± 1 Myr<sup>60</sup>)

85 **Maximum age:** 4520 Ma (4510 Ma ± 10 Myr<sup>2</sup>)

86 **Phylogenetic justification:** Cyanobacteria are the only living group of organisms that have  
87 evolved oxygenic photosynthesis. Proposed records of cyanobacteria from ancient rocks  
88 include Banded Ironstone Formations (BIFs), stromatolites, biomarkers, and a number of  
89 isotope systems. BIFs, which are found among the oldest sedimentary rocks, including  
90 protoliths of the 3.8 Ga Itsaq Gneiss, show a reduction of ferrous iron which has been claimed  
91 to occur due to cyanobacterial effects. However, arguments have been presented for the  
92 production of BIFs via abiogenic ultra-violet induced photolysis<sup>61</sup> and anoxygenic bacterial  
93 photosynthesis<sup>62,63</sup>. Early stromatolites are not sufficient evidence as they are not all biogenic  
94 and they don't necessarily require cyanobacteria for formation<sup>32,64</sup>. The best indicator of free  
95 oxygen at levels incompatible with photolysis, is from isotopes. These are a good proxy for  
96 oxygen because many elements are very sensitive to oxidative weathering. Prior to the Great  
97 Oxygenation Event, oxygen records in the form of isotopes extend back to 3.25 Gyr<sup>65</sup>. The  
98 authors report stable Fe and U-Th-Pb isotopes from the Manzimnyama BIF in the Fig Tree  
99 Group, Barberton, South Africa, which indicate a level of free oxygen indicative of  
100 cyanobacterial activity. They also find that there is a stratification in oxygen levels at the site,

101 showing an oxygenated shallow water layer and an anoxic deeper water. They argue that this  
102 is what we would expect to see in areas where there is some cyanobacterial activity. It is  
103 possible that oxygen was being produced in smaller quantities prior to the GOE and that these  
104 pockets of oxygen could be concentrated in an otherwise anoxic water column<sup>66</sup>. Other  
105 evidence for oxygenation from within this sequence comes from the Moodies group which lies  
106 immediately above the Fig Tree Group at Barberton. This has macroscopic tufted microbial  
107 mats<sup>67</sup>, that are thought to grow upwards towards a source of light, and in modern examples  
108 are made mostly of cyanobacteria. Additionally, this evidence for oxygenation is not isolated  
109 as numerous other lines of evidence, based mainly upon redox sensitive elements and other  
110 isotopes, now support the appearance of pre-GOE oxygen being produced by cyanobacteria<sup>68-</sup>  
111 <sup>73</sup>.

#### 112 **Age justification:**

113 **Hard minimum:** The isotopic evidence from the Manzimnyama BIF in the Fig Tree Group,  
114 Barberton, South Africa<sup>65</sup>. The age of the Fig Tree Group is well constrained with a spherule  
115 layer at its base dated at  $3258 \text{ Ma} \pm 3 \text{ Myr}$ <sup>74</sup>, and an overlying volcanic unit at its top dated at  
116  $3226 \text{ Ma} \pm 1 \text{ Myr}$ <sup>60</sup>. Hence, the minimum date we would assign is 3225 Myr.

117 **Soft maximum:** We can use the Moon-forming impact as a maximum constraint, as there no  
118 other event or date of significance which can be used in its place. This devastating event would  
119 have sterilised the Earth, hence any life now present on the planet must have evolved post-  
120 impact. It has been proposed that life would not have been able to survive the late heavy  
121 bombardment, which post-dated the Moon-forming impact, but this view has been contested  
122 as ideas of a cool early earth and an early ocean have been proposed<sup>46,47</sup> as well as models  
123 which show that life would have been able to survive during this intense bombardment<sup>48</sup>. It is  
124 also possible that there was no late heavy bombardment because evidence of its occurrence has  
125 been found on the Moon but not on Earth<sup>49</sup>. There is some debate over the exact timing of the

126 impact with proposed dates ranging from  $4.54 \text{ Ga} \pm 0.01 \text{ Myr}^{50}$  to  $\sim 4.44 \text{ Ga}^{51}$ . Some of the most  
127 recent simulations and models place the Moon-forming at  $\sim 4.47 \text{ Ga}$  based on asteroidal  
128 meteorites and siderophile elements<sup>52,53</sup>. This concurs with estimates based on U-Pb isotopes<sup>54</sup>,  
129 Hf/W isotopes<sup>55</sup> and Rb/Sr isotopes<sup>56</sup>. We use the oldest credible date to encompass reasonable  
130 uncertainty. The oldest date of  $5.4 \text{ Ga}$  is based on the Hf-W system<sup>50,57</sup>, around which there is  
131 some debate as to the amount of signal caused by cosmogenic production of  $^{182}\text{W}$  from  $^{181}\text{Ta}^{58}$ .  
132 Hence, the most credible date comes from the U-Pb system. We follow other critical  
133 reviewers<sup>59</sup>, in accepting Pb-Pb dating carried out on Moon rocks yields a date of  $4.51 \text{ Ga} \pm 10$   
134  $\text{Myr}^2$  a date which has also recently been confirmed by reanalysis of the Apollo zircons<sup>3</sup>. Thus,  
135 our maximum constraint is  $4.52 \text{ Ga}$ .

136

137 **Node: Total group Eukarya**

138 **Locality and Stratigraphy level:** Changcheng Group, Hebei Province, North China

139 **Minimum age:**  $1619.1 \text{ Ma}$  ( $1625.3 \pm 6.2 \text{ Myr}^{75}$ )

140 **Maximum age:**  $4520 \text{ Ma}$  ( $4510 \text{ Ma} \pm 10 \text{ Myr}^2$ )

141 **Phylogenetic justification:**

142 The record of eukaryotes covers a large timespan, during much of which the fossils attributed  
143 to eukaryotes are relatively simple and do not exhibit much morphological variation. The  
144 earliest of these that have been rigorously examined are those from the Changcheng Group in  
145 North China. These fossils come from two levels within this group, the Changzhougou Fm.  
146 and the Chuanlinggou Fm<sup>76,77</sup>. The units are made up of sandstone and shale, within which the  
147 fossils are found. The fossils are small and lenticular in shape with a carbonaceous outer sheath  
148 and what are interpreted to be excystment structures. The complexity exhibited by these sheaths  
149 and the inferred function, along with the size, places them into the eukaryote domain. The  
150 forms preserved at Changcheng are large enough, on average  $>125\mu\text{m}$  that they unlikely to be

151 any kind of Euacteria or Archaeabacter. Some bacterial cells can reach large sizes and size is  
152 not the best criteria to use but can be informative when used in conjunction with other  
153 characteristics. The authors demonstrate that the cells have a double sheath. The possibility  
154 that cyanobacteria have these structures is discussed but refuted on the basis of size. They are  
155 even proposed to be part of the green-algae plant lineage<sup>78</sup>. However, it is due to a lack of  
156 definitive features this claim cannot be substantiated. The age of these fossils encompasses  
157 reports of other fossils that are also Eukaryotic in nature, but those which also have uncertain  
158 affinities, such as the probable 1.56 Ga multicellular fossils<sup>79</sup>, the string of beads *Horodyskia*<sup>80</sup>,  
159 and *Shuiyousphaeridium*<sup>81</sup> and other acritarch and leiosphaerid forms<sup>82,83</sup>. Unfortunately, these  
160 fossils are not diagnostic of any crown group eukaryotes and so we can only use them to  
161 calibrate the total group of eukaryotes, helping us to provide a robust minimum for their  
162 appearance. Putative rhodophytes from the Chitrakoot Formation are slightly younger (see  
163 total-group Rhodophyta, below). Although some are sceptical of the eukaryotic nature of these  
164 fossils<sup>84</sup>, the combination of their morphology and size seems sufficient to assign them to a  
165 stem group eukaryote affinity.

166 **Age justification:**

167 **Hard minimum:**

168 As the oldest of these fossils are found in the Changzhougou Formation it is this that we can  
169 date. To acquire a minimum date for the whole formation, we use ash layers in the overlying  
170 formation, yielding an age of  $1625.3 \pm 6.2$  Myr<sup>75</sup>. The microfossils are present in both these  
171 layers, but have been described separately<sup>76,77</sup>. Hence, we can use the date of the oldest  
172 Chuanlinggou, 1619.1 Ma, to date the underlying Changzhougou.

173 **Soft maximum:** We can use the Moon-forming impact as a maximum constraint, as there no  
174 other event or date of significance which can be used in its place. This devastating event would  
175 have sterilised the Earth, hence any life now present on the planet must have evolved post-

176 impact. It has been proposed that life would not have been able to survive the late heavy  
177 bombardment, which post-dated the Moon-forming impact, but this view has been contested  
178 as ideas of a cool early earth and an early ocean have been proposed<sup>46,47</sup> as well as models  
179 which show that life would have been able to survive during this intense bombardment<sup>48</sup>. It is  
180 also possible that there was no late heavy bombardment because evidence of its occurrence has  
181 been found on the Moon but not on Earth<sup>49</sup>. There is some debate over the exact timing of the  
182 impact with proposed dates ranging from  $4.54 \text{ Ga} \pm 0.01 \text{ Myr}$ <sup>50</sup> to  $\sim 4.44 \text{ Ga}$ <sup>51</sup>. Some of the most  
183 recent simulations and models place the Moon-formation at  $\sim 4.47 \text{ Ga}$  based on asteroidal  
184 meteorites and siderophile elements<sup>52,53</sup>. This concurs with estimates based on U-Pb isotopes<sup>54</sup>,  
185 Hf/W isotopes<sup>55</sup> and Rb/Sr isotopes<sup>56</sup>. We use the oldest credible date to encompass reasonable  
186 uncertainty. The oldest date of  $5.4 \text{ Ga}$  is based on the Hf-W system<sup>50,57</sup>, around which there is  
187 some debate as to the amount of signal caused by cosmogenic production of <sup>182</sup>W from <sup>181</sup>Ta<sup>58</sup>.  
188 Hence, the most credible date comes from the U-Pb system. We follow other critical  
189 reviewers<sup>59</sup>, in accepting Pb-Pb dating carried out on Moon rocks yields a date of  $4.51 \text{ Ga} \pm 10$   
190  $\text{Myr}^2$  a date which has also recently been confirmed by reanalysis of the Apollo zircons<sup>3</sup>. Thus,  
191 our maximum constraint is  $4.52 \text{ Ga}$ .

192

193 **Node: Total group Rhodophyta**

194 **Specimen and fossil taxon:** *Bangiomorpha pubescens*. (Holotype) HUPC 62912, Slide  
195 HUST-1A, England Finder coordinates: O-35.

196 **Locality and Stratigraphy level:** Lower Hunting Formation, Somerset Island, arctic Canada.

197 **Soft Minimum age:**  $1033 \text{ Ma}$  ( $1092 \text{ Ma} \pm 59 \text{ Myr}$ <sup>86</sup>)

198 **Soft Maximum age:**  $1891 \text{ Ma}$  ( $1823 \text{ Ma} \pm 68 \text{ Myr}$ <sup>85</sup>)

199 **Phylogenetic justification:** There are several reports of red algae within the fossil record,  
200 stretching back into the Ediacaran, Neo- and Meso-proterozoic. The oldest of which are 1.6



201 billion year old fossils, *Rafatazmia chitrakootia* and *Ramathallus lobatus*, from the Chitrakoot  
202 Formation<sup>87</sup>. However, though both are suggested to be red algae and, while the remains are  
203 compatible with this interpretation, they do not preclude alternative assignments within total  
204 group Archaeplastida. *Bangiomorpha pubescens* is younger fossil, originally described as a  
205 Bangiale red algae in comparison to the extant *Bangia* due to the distinctive, radially orientated,  
206 intercalary division of its cells and its putative development<sup>88,89</sup>. It has therefore been used as  
207 a calibration for the red algae or sometimes more specifically for the bangiophyte red algae<sup>90,91</sup>.  
208 Red algae are united by general characteristics that are not commonly preserved in the fossil  
209 record, even in the most exceptional of circumstances, e.g. the red coloured pigments, and  
210 unstacked thylakoids within the chloroplasts<sup>92,93</sup>. Hence, *Bangiomorpha* was identified using  
211 potential developmental characters and the distinct shape of its cell arrangements. However,  
212 although these characters are distinctive<sup>92</sup>, they are also characteristic of several other red  
213 algae<sup>94</sup>. *Bangiomorpha* has been described as having a multicellular holdfast, a feature found  
214 in some Compsopogonophyceae, another group of basal red algae. Modern *Bangia* has an  
215 attachment rhizoid, not a multicellular holdfast indicating that the features of *Bangiomorpha*  
216 are not specifically Bangiale. These observations make it inappropriate to assign  
217 *Bangiomorpha* specifically to Bangiales. However, the distinct developmental, reproductive  
218 and morphological characteristics appear sufficient to assign *Bangiomorpha* to Rhodophyta as  
219 a whole. Hence, we can use this fossil to calibrate the node subtending Rhodophyta which link  
220 them to their nearest common ancestor.

#### 221 **Age justification:**

222 **Soft minimum constraint:** The oldest records of *Bangiomorpha pubescens* occur in the Lower  
223 Hunting Formation, of Somerset Island, Arctic Canada. A minimum age for the formation is  
224 based on the age of the Franklin igneous events, which have been dated to 723 Ma  $\pm$  3 Myr<sup>95</sup>,  
225 with a maximum age of 1267 Ma  $\pm$  2 Myr based on the McKenzie igneous events<sup>96</sup>. The

226 original description<sup>89</sup> cites an unpublished Pb-Pb date 1198 Ma  $\pm$  24 Myr as a best date for *B.*  
227 *pubescens*, however, this date remains unsubstantiated and so it must be discounted. The  
228 formation from which *Bangiomorpha* was recovered can be correlated lithostratigraphically to  
229 the Society Cliffs Formation<sup>97</sup> and the Uluksan Group<sup>98</sup>, which are closer to the base of the  
230 sequence, and dated at  $\sim$ 1267 Ma (Mesoproterozoic). This is substantially older than the  $\sim$ 723  
231 Ma minimum constraint on the age of the Lower Hunting Formation. The other option is a date  
232 of 1092  $\pm$  59 Myr<sup>86</sup> established from a shale layer present in the Arctic Bay formation, which  
233 is comparable<sup>99</sup> to the sequences below the *Bangiomorpha* fossiliferous layer i.e. the Lower  
234 Hunting formation. Although this date is older than the layer in which *Bangiomorpha* resides  
235 it is very close in age and so we employ it as a soft-minimum constraint, thus our date for this  
236 fossil is 1033 Ma.

237 **Soft Maximum Constraint:** The soft maximum constraint is based on the earliest record of  
238 eukaryotes<sup>76,77,100</sup> when, despite the presence of simple eukaryotes, there is no evidence of  
239 anything as complex as a definitively multicellular alga. Though the fossils present have been  
240 suggested by some to represent some kind of green algae<sup>78</sup>. The maximum for this formation  
241 is based on the igneous and metamorphic rocks that it overlies. These rocks are dated at 1823  
242 Ma  $\pm$  68 Myr<sup>85</sup>, yielding a soft maximum constraint of 1891 Ma.

243

244

245 **Nodes: Crown Alphaproteobacteria**

246 **Specimen and fossil taxon:** *Bangiomorpha pubescens*. (Holotype) HUPC 62912, Slide  
247 HUST-1A, England Finder coordinates: O-35.

248 **Locality and Stratigraphy level:** Lower Hunting Formation, Somerset Island, arctic Canada.

249 **Soft Minimum age:** 1033 Ma (1092 Ma  $\pm$  59 Myr<sup>86</sup>)

250 **Soft Maximum age:** 4520 Ma (4510 Ma  $\pm$  10 Myr<sup>2</sup>)

251 **Phylogenetic justification:** There are no fossils that can be attributed to Alphaproteobacteria.  
252 However, the important eukaryote organelle, the mitochondria has been found by consensus to  
253 have belonged within Alphaproteobacteria. This is because mitochondria formed via an  
254 endosymbiosis event with the protoeukaryote<sup>101</sup>. Within the alphaproteobacteria group the  
255 mitochondria are most commonly linked to the *Rickettsiales*<sup>102,103</sup> though arguments have also  
256 been made for them belonging to other alphaproteobacterial groups<sup>101,104,105</sup>. Mitochondria  
257 contain a mosaic of genes which are not all alphaproteobacterial in origin<sup>106,107</sup>, but nonetheless  
258 it is still believed to have originated within this group. *Bangiomorpha pubescens*<sup>88</sup> is a total  
259 group rhodophyte with features that link it to the basal rhodophyte groups such as its cell  
260 arrangement, and others which mean it cannot be placed specifically within any one of them.  
261 It is the oldest fossil in the record that can be confidently identified as a crown-eukaryote. There  
262 are older fossils that are eukaryotic in nature, but they cannot be placed with certainty into  
263 crown-Eukaryota. Hence, we can use *Bangiomorpha* to provide some level of constraint to the  
264 alphaproteobacteria, in a part of the tree of life that is otherwise poorly constrained.

265 **Age justification:**

266 **Soft minimum constraint:** The oldest records of *Bangiomorpha pubescens* occur in the Lower  
267 Hunting Formation, of Somerset Island, Arctic Canada. A minimum age for the formation is  
268 based on the age of the Franklin igneous events, which have been dated to 723 Ma  $\pm$  3 Myr<sup>95</sup>,  
269 with a maximum age of 1267 Ma  $\pm$  2 Myr based on the McKenzie igneous events<sup>96</sup>. The  
270 original description<sup>89</sup> cites an unpublished Pb-Pb date 1198 Ma  $\pm$  24 Myr as a best date for *B.*  
271 *pubescens*, however, this date remains unsubstantiated and so it must be discounted. The  
272 formation from which *Bangiomorpha* was recovered can be correlated lithostratigraphically to  
273 the Society Cliffs Formation<sup>97</sup> and the Uluksan Group<sup>98</sup>, which are closer to the base of the  
274 sequence, and dated at  $\sim$ 1267 Ma (Mesoproterozoic). This is substantially older than the  $\sim$ 723  
275 Ma minimum constraint on the age of the Lower Hunting Formation. The other option is a date

276 of  $1092 \pm 59$  Myr<sup>86</sup> established from a shale layer present in the Arctic Bay formation, which  
277 is comparable<sup>99</sup> to the sequences below the *Bangiomorpha* fossiliferous layer i.e. the Lower  
278 Hunting formation. Although this date is older than the layer in which *Bangiomorpha* resides  
279 it is very close in age and so we employ it as a soft-minimum constraint, thus, our minimum  
280 for this clade is 1033 Ma.

281 **Soft maximum:** We can use the Moon-forming impact as a maximum constraint, as there no  
282 other event or date of significance which can be used in its place. This devastating event would  
283 have sterilised the Earth, hence any life now present on the planet must have evolved post-  
284 impact. It has been proposed that life would not have been able to survive the late heavy  
285 bombardment, which post-dated the Moon-forming impact, but this view has been contested  
286 as ideas of a cool early Earth and an early ocean have been proposed<sup>46,47</sup> as well as models  
287 which show that life would have been able to survive during this intense bombardment<sup>48</sup>. It is  
288 also possible that there was no late heavy bombardment because evidence of its occurrence has  
289 been found on the Moon but not on Earth<sup>49</sup>. There is some debate over the exact timing of the  
290 impact with proposed dates ranging from  $4.54 \text{ Ga} \pm 0.01 \text{ Myr}$ <sup>50</sup> to  $\sim 4.44 \text{ Ga}$ <sup>51</sup>. Some of the most  
291 recent simulations and models place the Moon formation at  $\sim 4.47 \text{ Ga}$  based on asteroidal  
292 meteorites and siderophile elements<sup>52,53</sup>. This concurs with estimates based on U-Pb isotopes<sup>54</sup>,  
293 Hf/W isotopes<sup>55</sup> and Rb/Sr isotopes<sup>56</sup>. We use the oldest credible date to encompass reasonable  
294 uncertainty. The oldest date of  $5.4 \text{ Ga}$  is based on the Hf-W system<sup>50,57</sup>, around which there is  
295 some debate as to the amount of signal caused by cosmogenic production of <sup>182</sup>W from <sup>181</sup>Ta<sup>58</sup>.  
296 Hence, the most credible date comes from the U-Pb system. We follow other critical  
297 reviewers<sup>59</sup>, in accepting Pb-Pb dating carried out on Moon rocks yields a date of  $4.51 \text{ Ga} \pm 10$   
298 Myr<sup>2</sup> a date which has also recently been confirmed by reanalysis of the Apollo zircons<sup>3</sup>. Thus,  
299 our maximum constraint on the age of Alphaproteobacteria is  $4.52 \text{ Ga}$ .

300

301 **Nodes: Crown-Cyanobacteria**

302 **Specimen and fossil taxon:** *Bangiomorpha pubescens*. (Holotype) HUPC 62912, Slide  
303 HUST-1A, England Finder coordinates: O-35.

304 **Locality and Stratigraphy level:** Lower Hunting Formation, Somerset Island, arctic Canada.

305 **Soft Minimum age:** 1033 Ma (1092 Ma  $\pm$  59 Myr<sup>86</sup>)

306 **Soft Maximum age:** 4520 Ma (4510 Ma  $\pm$  10 Myr<sup>2</sup>)

307 **Phylogenetic justification:** Cyanobacteria are inferred to have a relatively plentiful fossil  
308 record. Often the Great Oxidation Event (GOE) and a number of fossils are used to calibrate  
309 the origins of the crown group and various lineages within it. However, the assumption that the  
310 GOE was caused by crown cyanobacteria rests on the assumption that photosynthesis evolved  
311 in associated with the crown clade. This has been recently challenged and so we do not use it  
312 as a calibration here<sup>108</sup>. Potential records of cyanobacteria extend into the Archaean but these  
313 are mainly simple cells and filaments<sup>109</sup> whose affinities cannot be substantiated<sup>110</sup>. There are  
314 fossils described as akinetes, cyanobacterial resting spores, from 21. Ga<sup>111</sup> and 1.6 Ga<sup>112</sup>.  
315 However, modern specimens show a range of characters and morphology making it difficult to  
316 relate these to any potential ancient counterparts, and other bacterial cells can also show this  
317 type of simple morphology<sup>113</sup>. The most convincing fossil remains are found in the Belcher  
318 Formation, Canada<sup>114,115</sup>, from around 1.9 billion years old, however, even these cannot be  
319 discriminated confidently from other bacterial grades<sup>113</sup>. Instead of using the above-mentioned  
320 fossils as calibration points, as in other studies<sup>116</sup>, we opted for a more conservative approach  
321 and used evidence for the oldest archaeplastid; this would have had a chloroplast, known to  
322 have originated in an endosymbiotic event with a cyanobacteria. There is no strict consensus  
323 as to which cyanobacterial group plastids evolved from with the main argument being whether  
324 they evolved from an early<sup>117</sup> or late<sup>118,119</sup> branching lineage within Cyanobacteria.  
325 *Bangiomorpha pubescens*<sup>88</sup> is a total group Rhodophyte (see total-group Rhodophyta, above).

326 It is the oldest fossil in the record that can be confidently identified as a crown group eukaryote;  
327 there are older fossils that are eukaryotic in nature, but they cannot be placed with any certainty  
328 into one of the extant eukaryotic groupings.

329 **Age justification:**

330 **Soft minimum constraint:** The oldest records of *Bangiomorpha pubescens* occur in the Lower  
331 Hunting Formation, of Somerset Island, Arctic Canada. A minimum age for the formation is  
332 based on the age of the Franklin igneous events, which have been dated to  $723 \text{ Ma} \pm 3 \text{ Myr}^{95}$ ,  
333 with an maximum age of  $1267 \text{ Ma} \pm 2 \text{ Myr}$  based on the McKenzie igneous events<sup>96</sup>. The  
334 original description<sup>89</sup> cites an unpublished Pb-Pb date  $1198 \text{ Ma} \pm 24 \text{ Myr}$  as a best date for *B.*  
335 *pubescens*, however, this date remains unsubstantiated and so it must be discounted. The  
336 formation from which *Bangiomorpha* was recovered can be correlated lithostratigraphically to  
337 the Society Cliffs Formation<sup>97</sup> and the Ulskan Group<sup>98</sup>, which are closer to the base of the  
338 sequence, and dated at  $\sim 1267 \text{ Ma}$  (Mesoproterozoic). This is substantially older than the  $\sim 723$   
339  $\text{Ma}$  minimum constraint on the age of the Lower Hunting Formation. The other option is a date  
340 of  $1092 \pm 59 \text{ Myr}^{86}$  established from a shale layer present in the Arctic Bay formation, which  
341 is comparable<sup>99</sup> to the sequences below the *Bangiomorpha* fossiliferous layer i.e. the Lower  
342 Hunting formation. Although this date is older than the layer in which *Bangiomorpha* resides  
343 it is very close in age and so we employ it as a soft-minimum constraint, thus, our minimum  
344 for this clade is  $1033 \text{ Ma}$ .

345 **Soft maximum:** We can use the Moon-forming impact as a maximum constraint, as there no  
346 other event or date of significance which can be used in its place. This devastating event would  
347 have sterilised the Earth, hence any life now present on the planet must have evolved post-  
348 impact. It has been proposed that life would not have been able to survive the late heavy  
349 bombardment, which post-dated the Moon-forming impact, but this view has been contested  
350 as ideas of a cool early earth and an early ocean have been proposed<sup>46,47</sup> as well as models

351 which show that life would have been able to survive during this intense bombardment<sup>48</sup>. It is  
352 also possible that there was no late heavy bombardment because evidence of its occurrence has  
353 been found on the Moon but not on Earth<sup>49</sup>. There is some debate over the exact timing of the  
354 impact with proposed dates ranging from 4.54 Ga  $\pm$  0.01 Myr<sup>50</sup> to  $\sim$ 4.44Ga<sup>51</sup>. Some of the most  
355 recent simulations and models place the Moon-forming at  $\sim$ 4.47 Ga based on asteroidal  
356 meteorites and siderophile elements<sup>52,53</sup>. This concurs with estimates based on U-Pb isotopes<sup>54</sup>,  
357 Hf/W isotopes<sup>55</sup> and Rb/Sr isotopes<sup>56</sup>. We use the oldest credible date to encompass reasonable  
358 uncertainty. The oldest date of 5.4 Ga is based on the Hf-W system<sup>50,57</sup>, around which there is  
359 some debate as to the amount of signal caused by cosmogenic production of <sup>182</sup>W from <sup>181</sup>Ta<sup>58</sup>.  
360 Hence, the most credible date comes from the U-Pb system. We follow other critical  
361 reviewers<sup>59</sup>, in accepting Pb-Pb dating carried out on Moon rocks yields a date of 4.51 Ga  $\pm$  10  
362 Myr<sup>2</sup> a date which has also recently been confirmed by reanalysis of the Apollo zircons<sup>3</sup>. Thus,  
363 our maximum constraint is 4.52 Ga.

364

365 **Note:** Dikarya

366 **Locality and stratigraphy level:** Rhynie, Aberdeenshire, Scotland. Lower Devonian

367 **Minimum age:** 392.1 Ma (393.3 Ma  $\pm$  1.2 Myr<sup>120</sup>)

368 **Maximum age:** 1891 Ma (1823 Ma  $\pm$  68 Myr<sup>85</sup>)

369 **Phylogenetic justification:** The minimum constraint is based upon fossils from the Rhynie  
370 Chert<sup>121</sup> described as *Paleopyrenomycites devonicus*<sup>122</sup>. This fungal fossil is found in  
371 association with the roots of early plants and has key characteristics that relate it to the  
372 Ascomycota, including containing the sexual spores (asci) in a sac-like structure, the ascus.  
373 Although there are earlier examples of possible fossil fungi much of their interpretation is  
374 spurious. This category includes *Tappania*, which was once interpreted as a fungus<sup>123</sup>, but is  
375 now considered to be an acritarch<sup>124</sup>, and the ‘lichen-like’ fossil from Doushantuo<sup>125</sup> is difficult

376 to discriminate from diagenetic artefacts that are characteristic of fossils from the Weng'an  
377 Biota<sup>126</sup>. There is a more convincing record of a possible Glomeromycota fungus from the  
378 Ordovician<sup>127</sup>. However, this specimen has not been assigned with as much confidence to a  
379 distinct fungal lineage as those fossils contained in the younger Devonian Rhynie Chert  
380 deposits. The oldest report of a fungi-like fossil is from the Ongeluk Formation, ~2.4 Ga<sup>128</sup>.  
381 The filaments are situated within basaltic lavas, a rock type shown to host putative fungal  
382 species in more recent Eocene basalts<sup>129-131</sup>. However, although the Ongeluk fossils do show  
383 many typical fungal features, these can also be attributed to the actinobacteria, such as the  
384 hyphae-like cells and Y-junctions, thus, their affinities are ambiguous. Hence, we use the  
385 confidently assigned fungi fossil from the Rhynie chert to constrain the minimum age of the  
386 clade comprising Ascomycota and Basidiomycota and sister lineage Glomeromycota.

387 **Age justification:**

388 **Hard minimum:** Proposed dates for the Rhynie Chert system have been mostly based upon  
389 zircons from volcanic deposits in the sequence. Two recent dates proposed are 407.1 Ma  $\pm$  2.2  
390 Myr<sup>132</sup> and 411.5 Ma  $\pm$  1.3 Myr<sup>133</sup>. The former is from a hydrothermally produced layer within  
391 the sequence and with which there is high oxygen isotopic homogeneity from the layers with  
392 the spore bearing assemblage<sup>132</sup>. The other date is derived from the Milton of Noth andesite<sup>133</sup>.  
393 Despite being based on zircon evidence, neither of these dates is suitable; the Milton of Noth  
394 andesite has uncertain placement within the sequence but is most likely found beneath the  
395 Rhynie spore-bearing layer<sup>134</sup> and so cannot be used to provide a minimum date. The later  
396 date<sup>132</sup> is also unsuitable because the layers which are dated do not come from above the spore  
397 assemblage, and the method of dating has some problems<sup>135</sup>. Therefore, we base our minimum  
398 clade age constraint on the spore assemblage characterizing the Rhynie Chert. This places the  
399 Rhynie Chert in the early Pragian to early Emsian<sup>136</sup>. The age of the top of the Emsian-Eifelian



400 boundary is dated as  $393.3 \text{ Ma} \pm 1.2 \text{ Myr}^{120}$ . Hence our minimum clade age constraint is 392.1  
401 Ma.

402 **Soft maximum:** The maximum for this calibration is based on the earliest record of  
403 eukaryotes<sup>76,77,100</sup> when, despite the presence of simple eukaryotes, there is no evidence of  
404 anything as complex as a multicellular alga. Though the fossils present have been suggested  
405 by some to represent some kind of green algae<sup>78</sup>. This date also encompasses the recent  
406 discovery of possible multicellular eukaryotes from the 1.56 Ga<sup>79</sup>. The maximum for this  
407 formation is based on the igneous and metamorphic rocks that lie beneath it. These rocks are  
408 dated at  $1823 \text{ Ma} \pm 68 \text{ Myr}^{85}$ , thus, our maximum is 1891 Ma.

409

410 **Node: Crown group Foraminifera**

411 **Locality and Stratigraphy level:** The Chapel Island Formation, Newfoundland, Canada.  
412 Lower Cambrian.

413 **Minimum age:** 525.5 Ma (525.5 Myr<sup>120</sup>)

414 **Maximum age:** 1891 Ma ( $1823 \text{ Ma} \pm 68 \text{ Myr}^{85}$ )

415 **Phylogenetic justification:**

416 The foraminifera are a group of testate eukaryotes that are part of Rhizaria, a group that also  
417 includes Cercozoa and Radiolaria. Foraminifera are well known from most of the Proterozoic  
418 before which there are scattered reports with varying degrees of validity. The very oldest  
419 possible reports come from Post-Sturtian deposits located in Namibia and Mongolia<sup>137,138</sup>.  
420 These are interpreted as foraminifera based on the composition of the tests found. However,  
421 the authors cautiously interpret them as foraminifera, partly due to the shape that is not seen in  
422 modern forms, so there is still a level of uncertainty in their affinity. Other Ediacaran fossils  
423 have been described as foraminifera, such as the enigmatic *Palaeopascichmus*. However, these  
424 fossils lack a number of key diagnostic features of foraminifera<sup>139</sup>. Generally the oldest forms

425 are regarded to be those from Western African<sup>140</sup> and from the Lower Cambrian of Canada<sup>141</sup>.  
426 Though Culver described the Western African forms as Cambrian in nature, due to their  
427 position and the appearance of a Cambrian snail in the same deposits, new dating suggests that  
428 the formation might actually be closer to the Ordovician in age<sup>142</sup>. The fossil described as  
429 *Platysolenites cooperi*<sup>141</sup> has had its foraminiferal affinity questioned based on the possible  
430 composition of their tests<sup>143,144</sup>. However, in their paper McIlroy and colleagues dispel this  
431 doubt by looking in detail at the wall composition. They find that it is composed of agglutinated  
432 grains, was organically bound and probably flexible in life. They also find that it shows  
433 evidence of fracturing that was repaired during the organism's lifetime, on the outside of the  
434 wall, a character not seen in metazoans. This and other support from previous reviews<sup>145-147</sup>  
435 provides strong evidence for *P. cooperi* being an early agglutinating foraminifera.

436 **Age justification:**

437 **Minimum:** The oldest fossils of *P. cooperi* come from the latest Ediacaran to Lower Cambrian  
438 in Newfoundland, the Chapel Island formation<sup>141</sup>. This formation sits just above the Cambrian  
439 boundary and is correlated to the Nemakit-Daldyian which has a minimum date of 525.5 Ma  
440 according to the latest version of the geological timescale<sup>120</sup>.

441 **Maximum:** The maximum for this calibration is based on the earliest record of  
442 eukaryotes<sup>76,77,100</sup> recovered from the Changzhougou Formation (China), when, despite the  
443 presence of simple eukaryotes, there is no evidence of crown-eukaryote lineages or their  
444 characters. This date also encompasses the recent discovery of possible multicellular  
445 eukaryotes from the 1.56 Ga<sup>79</sup> as well as the reports of possible ameboid tests, called vase-  
446 shaped microfossils which might belong to a clade of the Rhizaria<sup>137</sup>. The maximum for the  
447 Changcheng Group is based on the igneous and metamorphic rocks that lie beneath it. These  
448 rocks are dated at  $1823 \pm 68$  Myr<sup>85</sup>, thus, our maximum is 1891 Ma.

449

450 **Node: Embryophytes**

451 **Locality and Stratigraphy level:** Qusaiba-1 core from the Quasim formation of northern  
452 Saudi Arabia

453 **Minimum age:** 448.5 Ma<sup>149</sup>

454 **Maximum age:** 509 Ma<sup>149</sup>

455 **Age justification:**

456 The oldest evidence of embryophytes are trilete spores. We follow Clark and Donoghue<sup>149</sup> in  
457 dating these to a minimum date of 448.5 Ma. The maximum is placed at the Bright Angel Shale  
458 which has a date of 507.2-509 Ma, hence, the maximum that we use to 509 Ma.

459

460 **Node: Angiospermae**

461 **Locality and Stratigraphy level:** Cowleaze Chine Member of the Vectis Formation of the Isle  
462 of Wight

463 **Minimum age:** 125.9 Ma (126.3 Ma  $\pm$  0.4 Myr<sup>149</sup>)

464 **Maximum age:** 247.3 Ma (247.1 Ma  $\pm$  0.2 Myr<sup>149</sup>)

465 **Age justification:**

466 The oldest evidence of angiosperms is tricolpate pollen. We follow Clark and Donoghue<sup>149</sup>  
467 and date the pollen to the Cowleaze Chine Member, Isle of White. This yields a minimum date  
468 of 126.3  $\pm$  0.4 Myr and a maximum date of 247.1 Ma  $\pm$  0.2 Myr from a rock layer free of  
469 angiosperm pollen.

470

471

472 **Node: Metazoa**

473 **Locality and Stratigraphy level:** White Sea Formation, Russia

474 **Minimum age:** 550.25 Ma (552.85 Ma  $\pm$  2.6 Myr<sup>150</sup>)

475 Maximum age: 833 Ma (827 Ma  $\pm$  6 Myr<sup>150</sup>)

476 **Age justification:** The oldest uncontroversial evidence for Metazoa is the fossil *Kimberella*  
477 *quadrata*. The oldest specimen of this is found in the White Sea, Russia, for which a minimum  
478 date of 552.85 Ma  $\pm$  2.6 Myr has been established. The maximum is set as 827 Ma  $\pm$  6 from a  
479 formation that shows no evidence of any total group metazoans.

480

481

482

483

484

485

486

487

488

489

490

491

492

493

494

495

496

497 **S2. Gene families used in this study by *S. cerevisiae* identification code.**

| <i>S. cerevisiae</i> gene IDs | Gene family number (arbitrary, corresponds to dm_XX.fa naming scheme) |
|-------------------------------|-----------------------------------------------------------------------|
| Rps14bp                       | (1)                                                                   |
| Rps23bp                       | (6)                                                                   |
| Fun12p                        | (14)                                                                  |
| Rpl11ap                       | (15)                                                                  |
| Rsp3p                         | (20)                                                                  |
| Rps16ap                       | (22)                                                                  |
| Rpl1ap                        | (24)                                                                  |
| Rpl2bp                        | (29)                                                                  |
| Rpl23bp                       | (30)                                                                  |
| Rpl12ap                       | (31)                                                                  |
| Eft1p                         | (33)                                                                  |
| Kae1p                         | (34)                                                                  |
| Rps0bp                        | (35)                                                                  |
| Rps2p                         | (36)                                                                  |
| Rps5p                         | (37)                                                                  |
| Srp54p                        | (40)                                                                  |
| Tef1p                         | (4)                                                                   |
| Rli1p                         | (5)                                                                   |
| Dps1p                         | (10)                                                                  |
| Rpa190p                       | (11)                                                                  |
| Sec61p                        | (12)                                                                  |
| Cct5p                         | (16)                                                                  |
| Rfc2p                         | (17)                                                                  |
| Vma2p                         | (23)                                                                  |
| Map2p                         | (25)                                                                  |
| Rpl16ap                       | (28)                                                                  |
| Gln4p                         | (32)                                                                  |
| Rpa135p                       | (39)                                                                  |
| Srp101p                       | (41)                                                                  |

498

499

500

### 501 S3 Supplementary results – Phylogeny.

502 We performed phylogenetic analyses of our complete dataset to evaluate whether it supported  
503 generally agreed relationships. While the scope of this study is not that of resolving  
504 relationships at the root of the tree of life, this is important to make sure that the genes we  
505 selected are informative and do not display obvious paralogy or xenology problems. Analyses  
506 of the complete dataset failed to converge under both GTR+G and CAT-GTR+G. Irrespective  
507 of that the trees inferred under both models reflect current consensus relatively well. CAT-  
508 GTR+G analyses in particular invariably found support for the Eocyte tree, even if with  
509 *Koarchaeum cryptofilum* as the sister of Eukaryota rather than the Lokiarchaeota (Figure S3.1).  
510 Differently, GTR+G analyses found support for either the Eocyte tree (still with *Koarchaeum*  
511 *cryptofilum* as sister of the Eukaryota) or for Woese's Three Domains Tree (Figure S3.2a and  
512 S3.2b). RogueNaRok<sup>140</sup> identified five rogue taxa in the dataset (*Koarchaeum cryptofilum*,  
513 *Treponema pallidum*, *Fibrobacter succinogenes*, *Cyanophora paradoxa* and *Actinomadura*  
514 *madurae*). CAT-GTR+G analyses performed after excluding these taxa still failed to converge  
515 (Figure S3.3). However, with the exclusion of the relationships among the eukaryotic  
516 supergroups, all key relationships in the CAT-GTR+G tree of Figure S3.3 are resolved  
517 according to common knowledge. The GTR+G analysis of the RogueNaRok reduced dataset  
518 (Figure S3.4), converged well and resolved the tree in essential agreement with the CAT-  
519 GTR+G analysis, supporting in particular the Lokiarchaeota as the sister of the Eukaryota.  
520 Overall, these results indicate that instability is limited to the tip-ward part of the tree and this  
521 is not unsurprising given that we specifically targeted highly conserved genes to better date the  
522 history of life closer to the root rather than the tips. The only area in which our converged  
523 GTR+G tree, and our unconverged CAT-GTR+G, tree disagreed with the current consensus  
524 were the relationships of the eukaryotic supergroups. This might indicate Long Branch  
525 Attraction Artifacts. To test this hypothesis we performed a CAT-GTR+G analysis including

526 only the eukaryotic taxa and found relationships that are fully compatible with the current  
527 consensus (Figure S3.5). This indicates that the eukaryotic relationships in Figure S3.3 and  
528 S3.4 probably represent tree reconstruction artefacts caused by the attraction between  
529 eukaryotes lineages (like the secondarily amitochondriate *Giardia lamblia*) and the prokaryotes.  
530 Accordingly, for our clock analyses we used a fixed tree topology compatible with the trees in  
531 Figure S3.3 and S3.4, but where the eukaryotes were resolved as in Figure S3.5 and unstable  
532 taxa identified by RogueNaRock<sup>151</sup> were reintroduced and resolved according current  
533 consensus. This tree is reported in Figure 3 in the main text.  
534

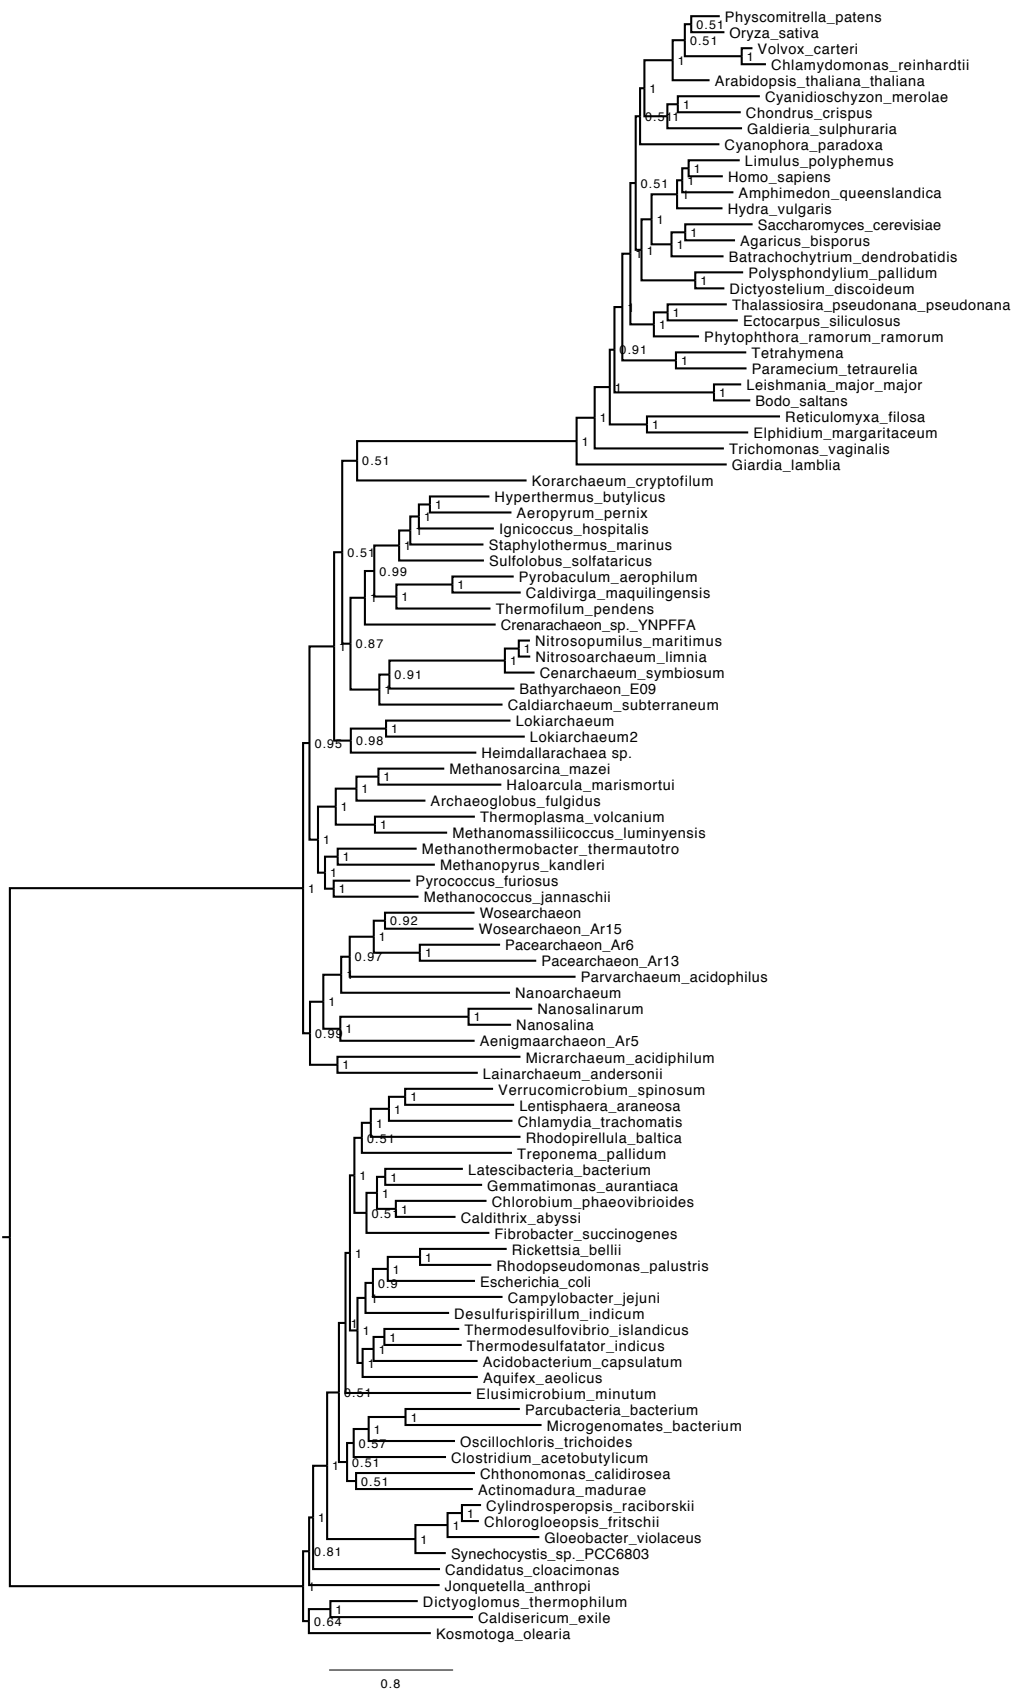

535

536 **S3.1.** Phylogeny produced using PhyloBayes with a CAT-GTR+G model (not converged and

537 including rogue taxa).



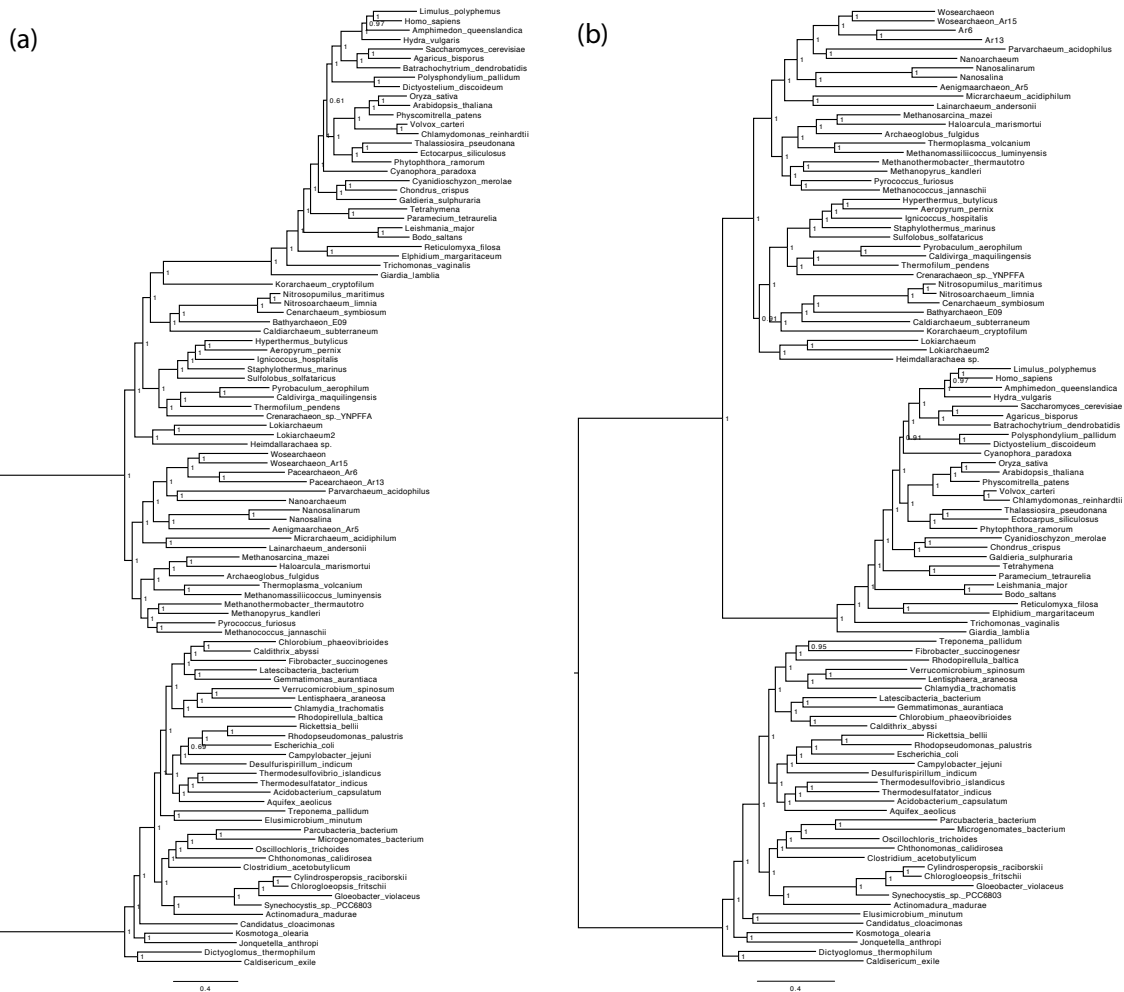

538

539 **S3.2.** Phylogenies produced by two independent runs using PhyloBayes with a GTR+G

540 model (not converged and including rogue taxa) (a) Showing support for the eocyte tree and

541 (b) for Weese's Three Domains Tree.

542

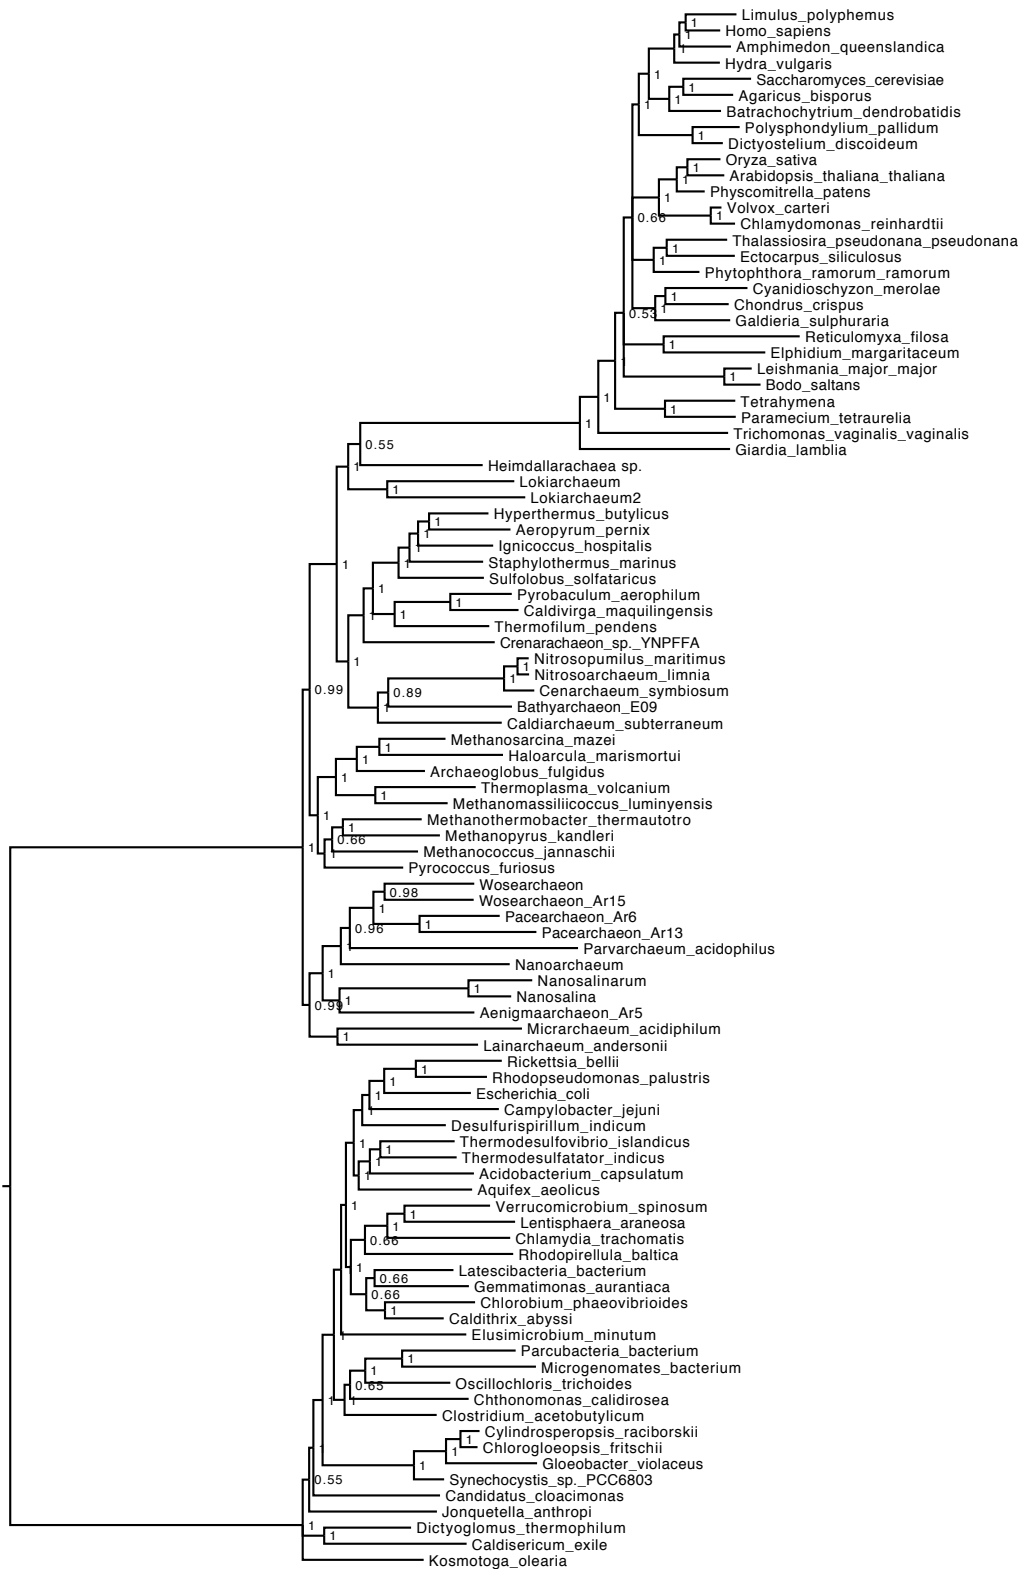

543

544 **S3.3.** Phylogeny produced using PhyloBayes with a CAT-GTR+G model (not converged and

545 excluding rogue taxa).

546

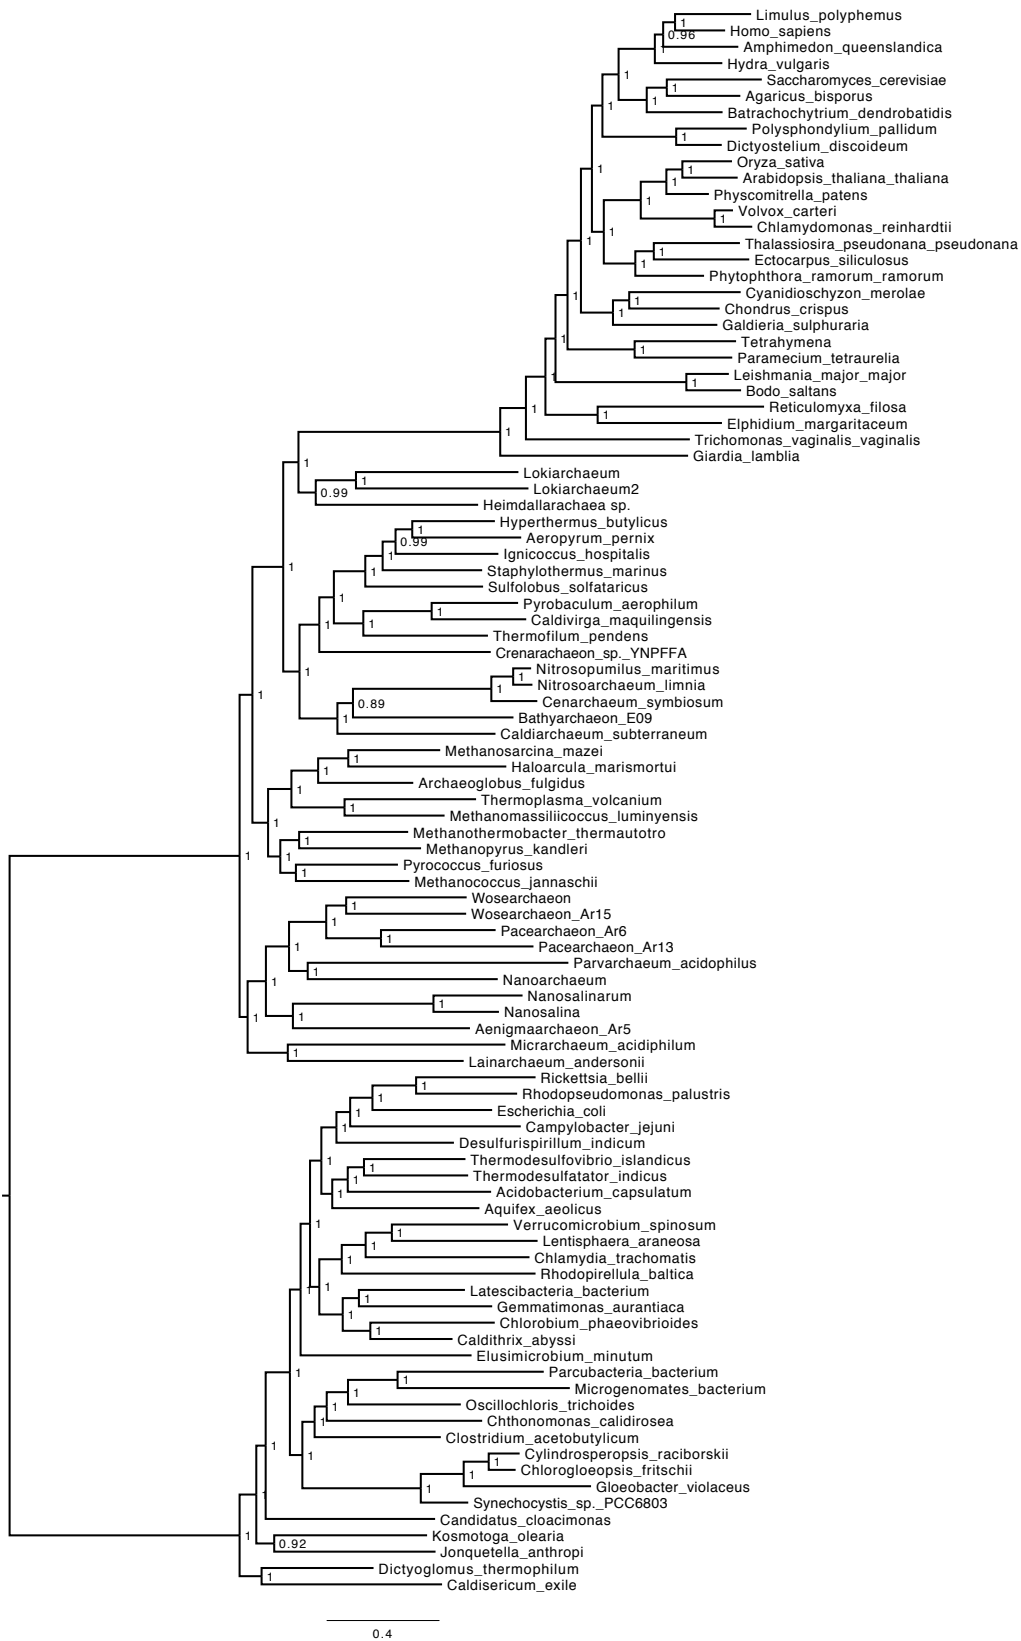

547

548 **S3.4.** Phylogeny produced using PhyloBayes with a GTR+G model. This analysis converged

549 well (number of cycles = 3872; Burnin = 1000; BPcomp Maxdiff = 0.18; Tracecomp

550 Minimum Effective Size = 244; Tracecomp maximum relative difference = 0.15).

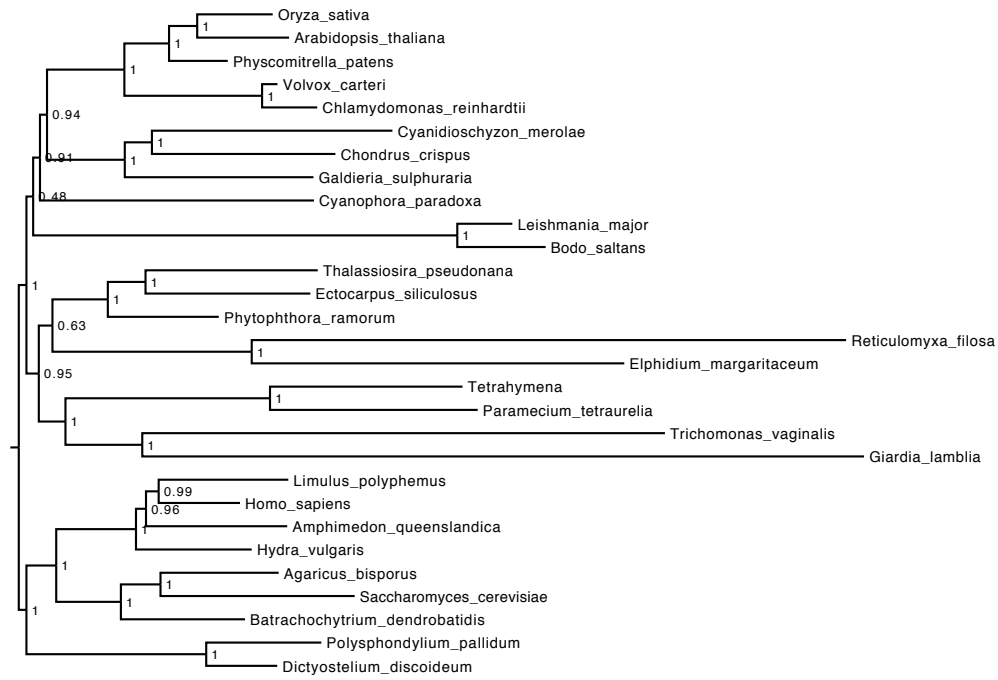

551

552 **S3.5.** Phylogeny showing the Eukaryote only relationships. Produced using PhyloBayes with  
 553 a CAT-GTR+G model. This analysis reached an acceptable level of convergence (number of  
 554 cycles = 34660; Burnin = 15000; BPcomp Maxdiff = 0.05; Tracecomp Minimum Effective  
 555 Size = 170; Tracecomp maximum relative difference = 2.2).

556

557

558

559

560

561

562

563

564

565

566

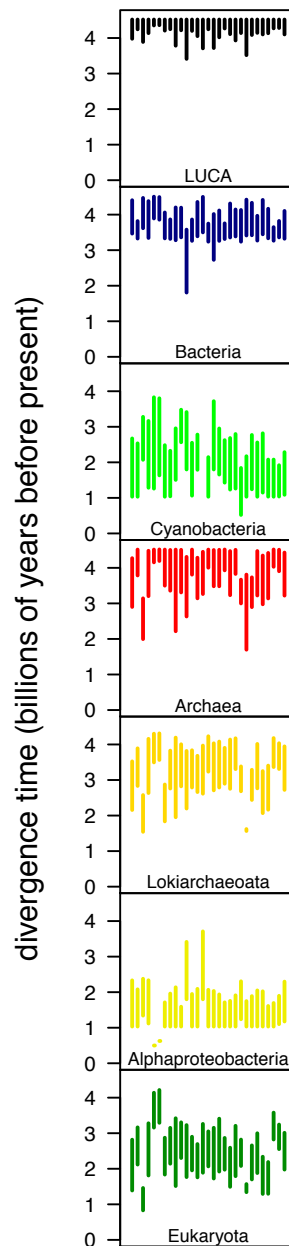

571 **S4.1.** Divergence dates for 7 key nodes in the tree of life produced by implementing the  
572 molecular clock on a gene by gene basis. In each case a Cauchy 50% calibration distribution  
573 density and an uncorrelated clock model was used. On each of the plots the bars represent the  
574 divergence dates for genes 1-29.

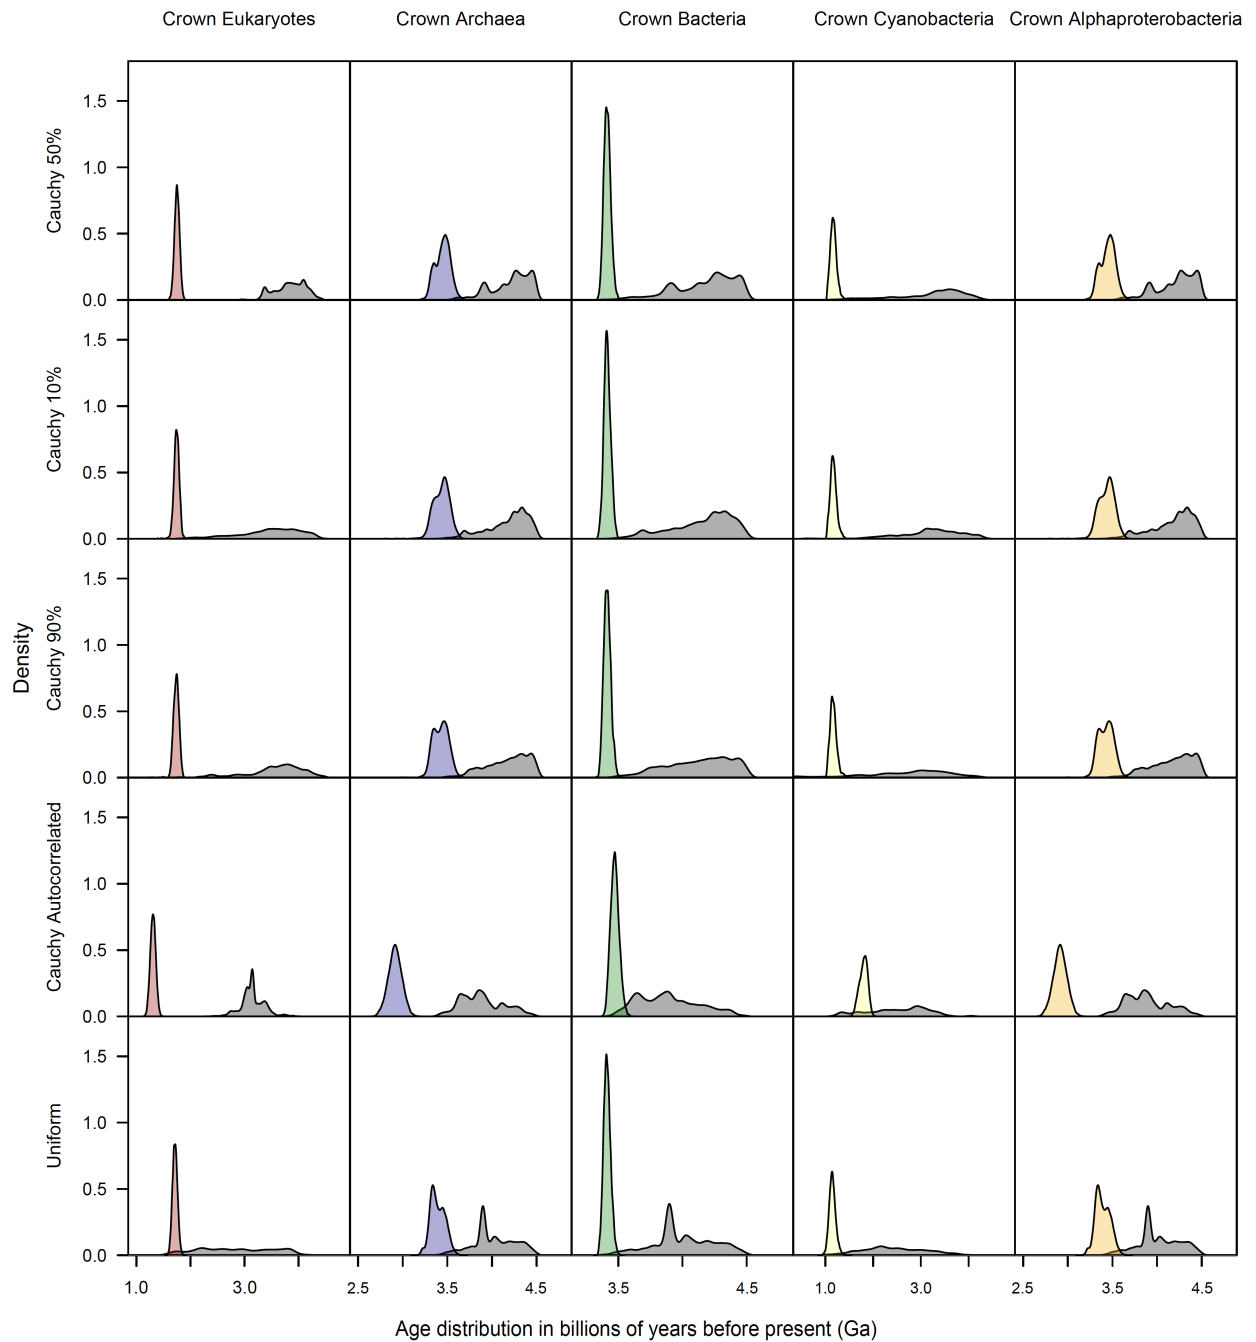

576  
577  
578

579 **S4.2.** Density plots comparing the prior (grey) and the posterior distributions (colour) in  
 580 divergence times for 5 nodes in the tree of life. The different calibration density distributions  
 581 and clock models used are listed along the right side.

age billion of years before present (Ga )

4.6 4 3 2 1 0

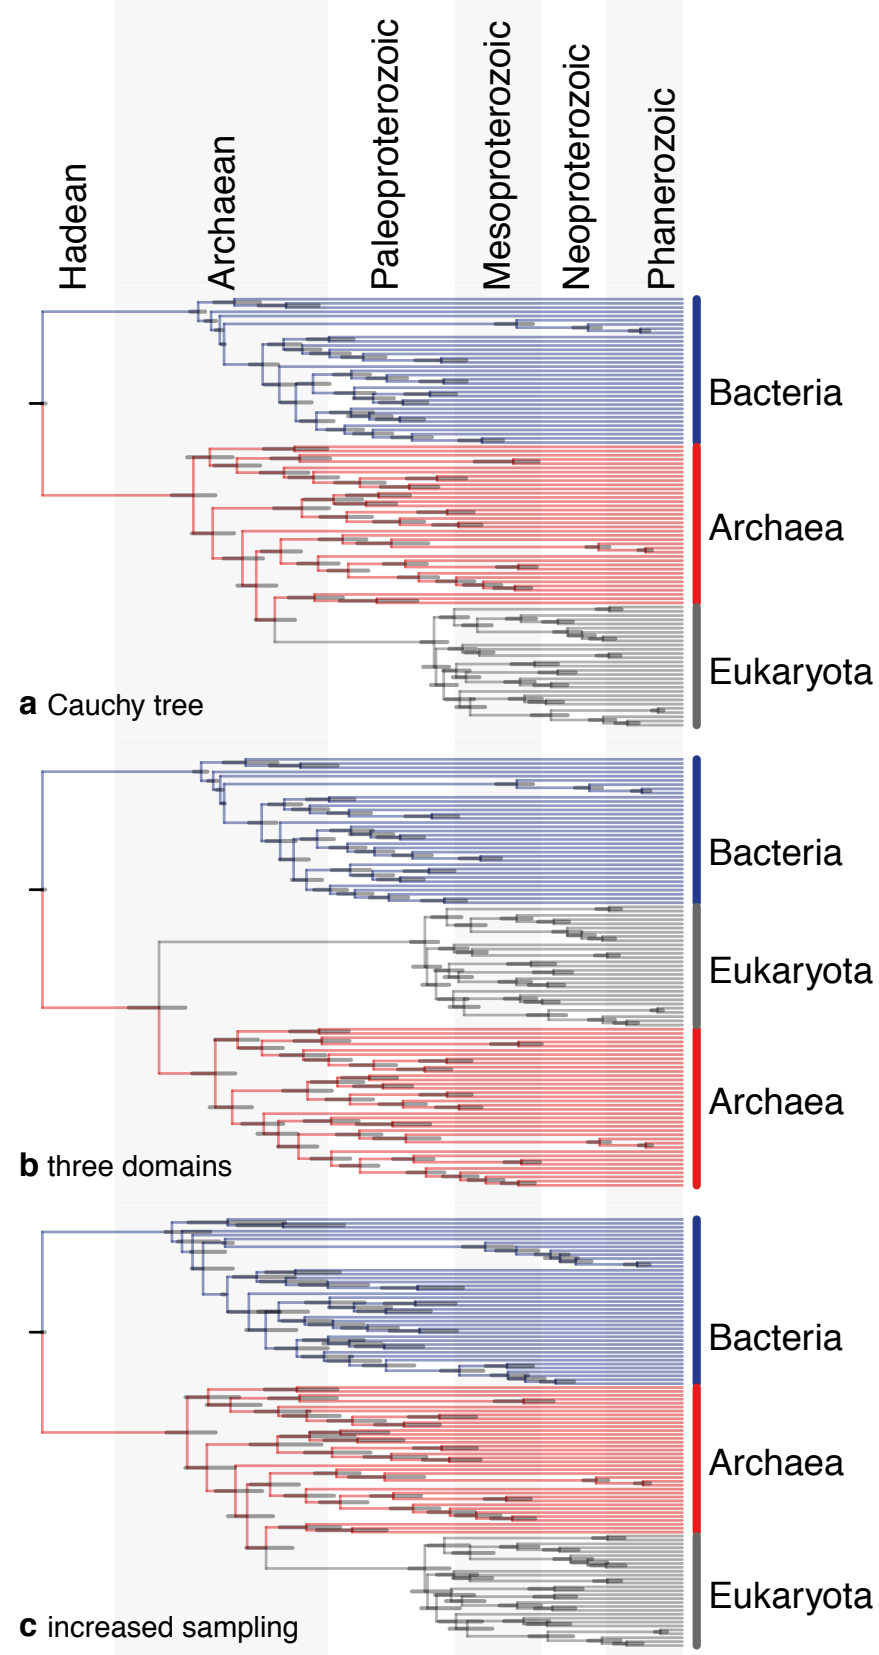

583

584 **S4.3.** Comparison of divergence dates produced using (a) a Cauchy 50% calibration

585 distribution density with Eocyte topology (see also Figure 1a), (b) a Cauchy 50% calibration

586 distribution density with a Three Domain Topology, and (c) a Cauchy 50% calibration

587 distribution density with additional species in Alphaproteobacteria and Cyanobacteria. The

588 Eukaryota are highlighted in grey, the Archaeobacteria in red and the Eubacteria in blue.

589

590

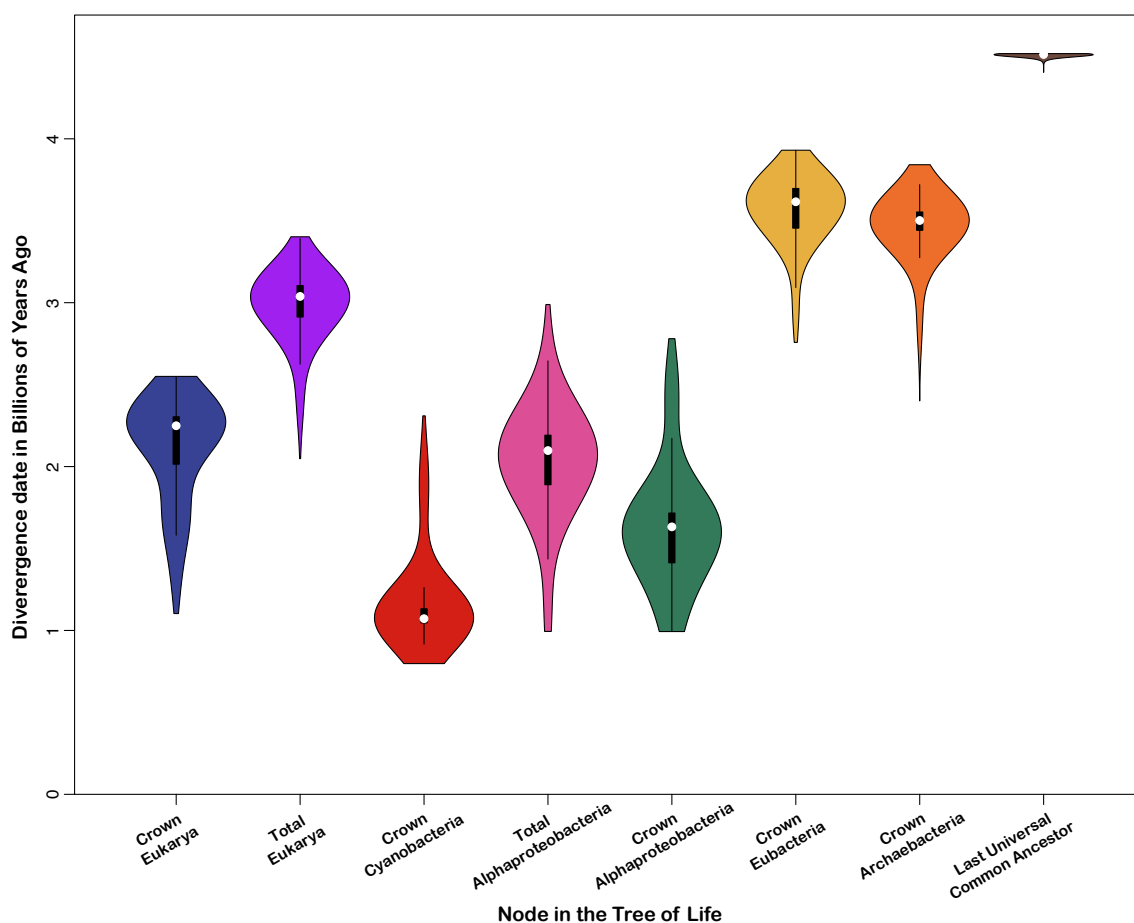

591

592 **S4.4.** Violin plots showing the spread of divergence dates for key nodes in the tree of life from

593 20 different analyses: Cauchy 50% calibration distribution density; Cauchy 10% calibration

594 distribution density; Cauchy 90% calibration distribution density; Cauchy 50% calibration

595 distribution density with an autocorrelated clock model; Uniform calibration distribution



596 density; and the 15 tree topologies in the 95% credible set of trees from our original phylobayes  
 597 analysis.

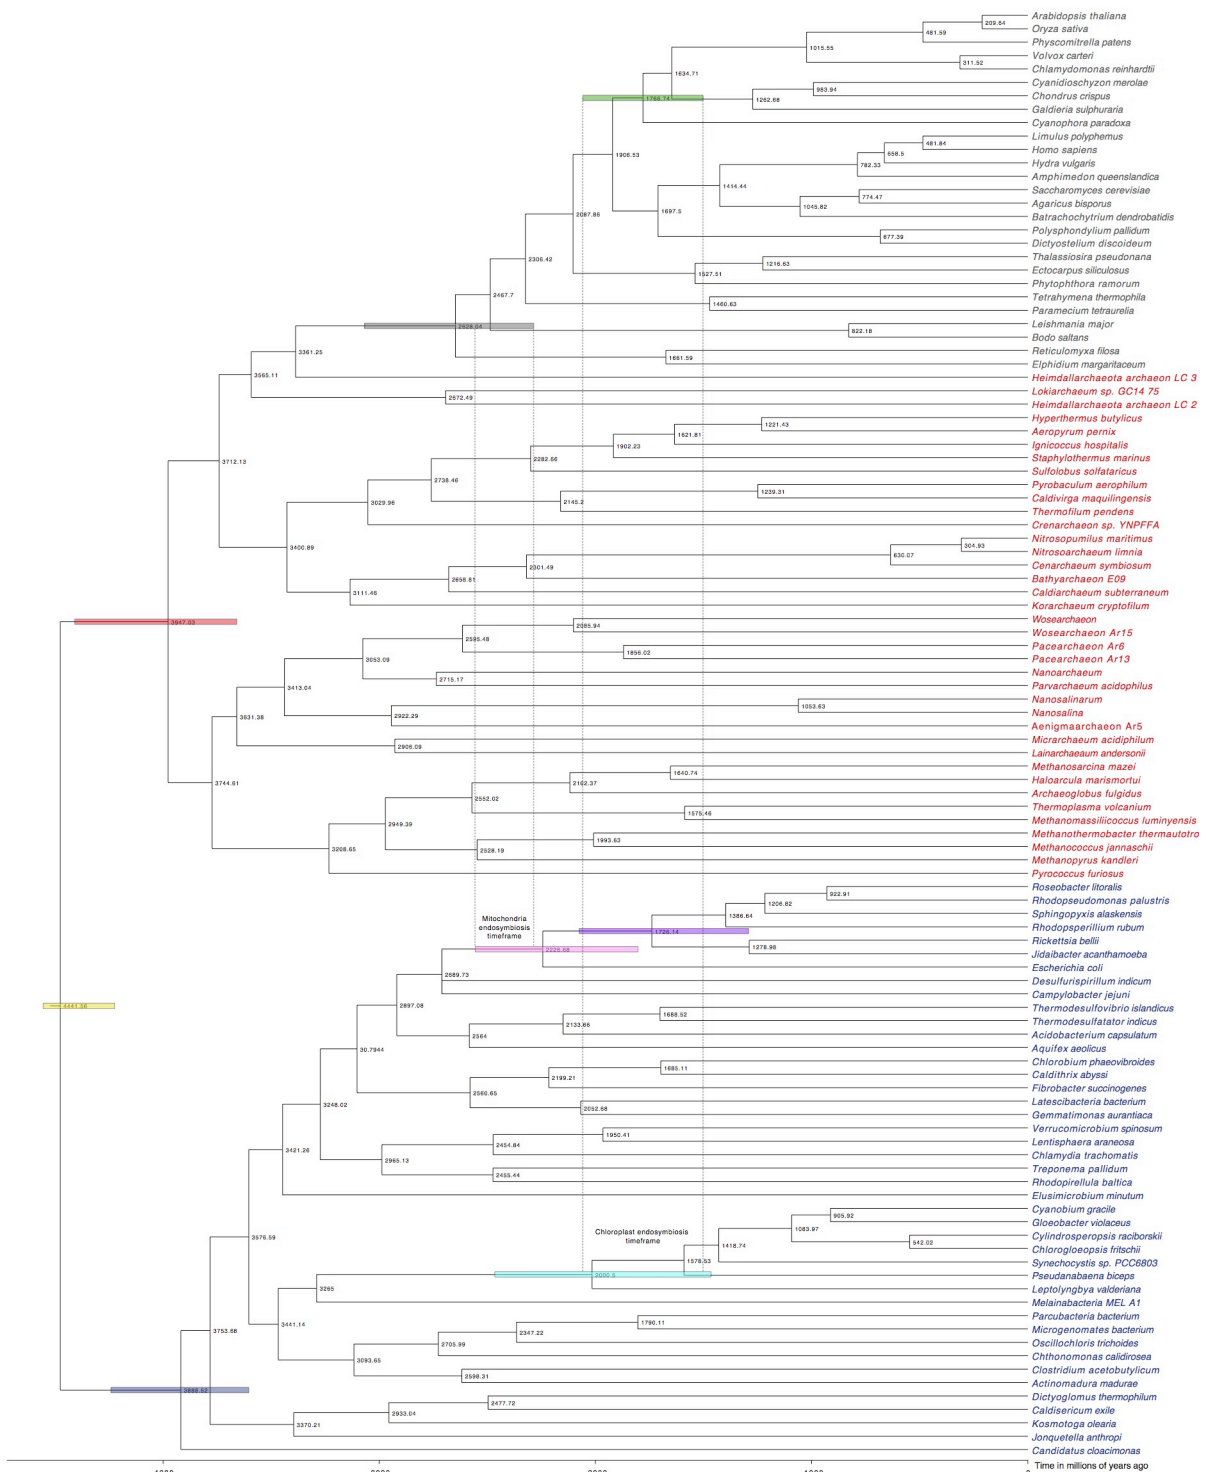

602 under the LG model of substitution with a discrete gamma model of rate variation with four  
603 bins. A uniform prior was placed on the topology, except for the 10 internal nodes with set  
604 time priors which were constrained to be monophyletic. Prior time constraints on these nodes  
605 and the root were set as uniform distributions with the bounds taken from the fossil ages – as  
606 in all our other analyses. Branch rates were sampled assuming an uncorrelated Independent  
607 Gamma Rates (IGR) model<sup>153</sup> with variance sampled from an exponential distribution (mean  
608 = 10). The MCMC model sampled every 1000 generations with four independent runs. The  
609 tree was summarised as a 50% majority-rule consensus, and model convergence was assessed  
610 by analysing Potential Scale Reduction Factor (PSRF, target < 1.05), Effective Sample Size  
611 (ESS, target > 200), and visual inspection using TRACER.

612         Although the results we obtained using co-estimation of time and topology are  
613 consistent with those of our other analyses, the co-estimation MCMC runs did not converge  
614 within a reasonable amount of computational time (20,000,000 generations), and so they  
615 cannot be used to draw definitive conclusions. The similarity between the MCMC samples  
616 drawn under co-estimation and those of our other analyses - particularly the well-converged  
617 analysis in which we dated the 95% credibility set of topologies (S4.4) - suggest that, at least  
618 in this case, there may be little practical advantage in joint estimation when compared to two-  
619 step analysis<sup>154,155</sup>.

620

621

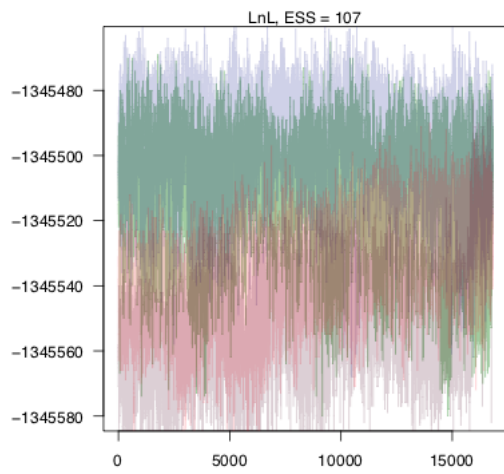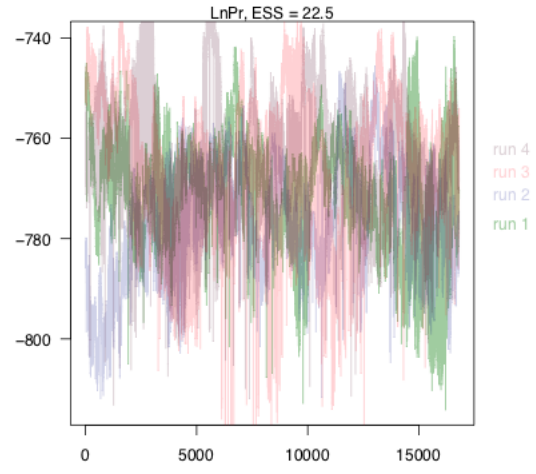

622

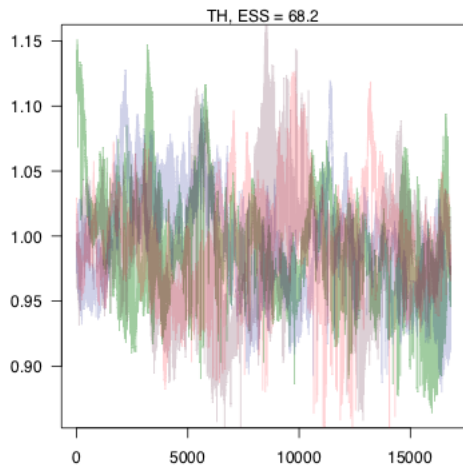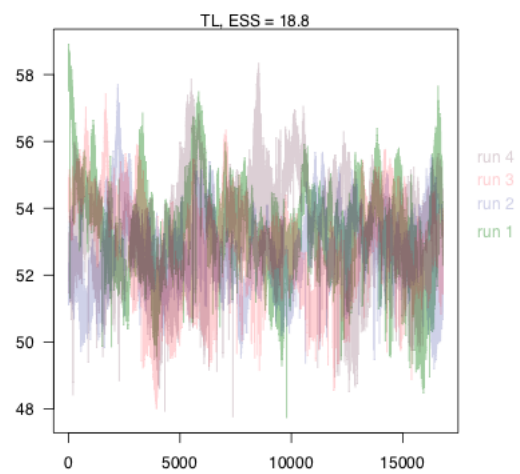

623

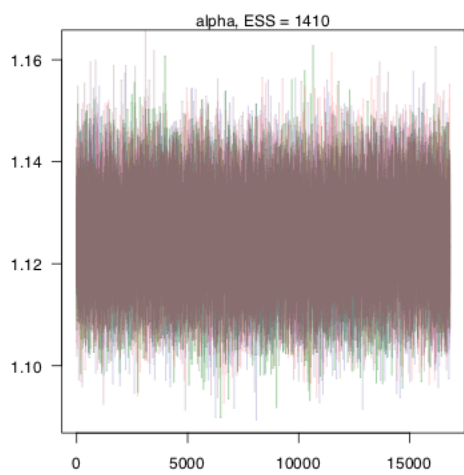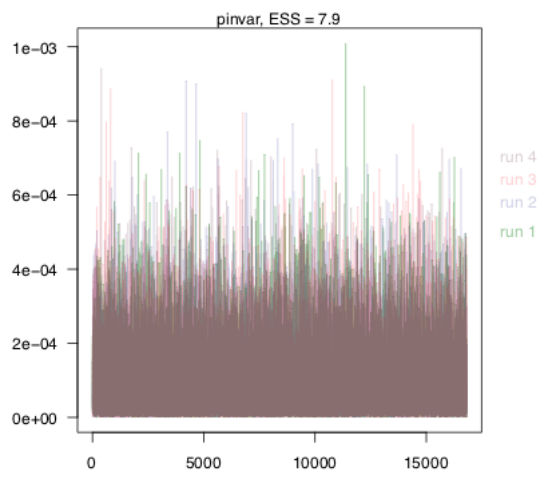

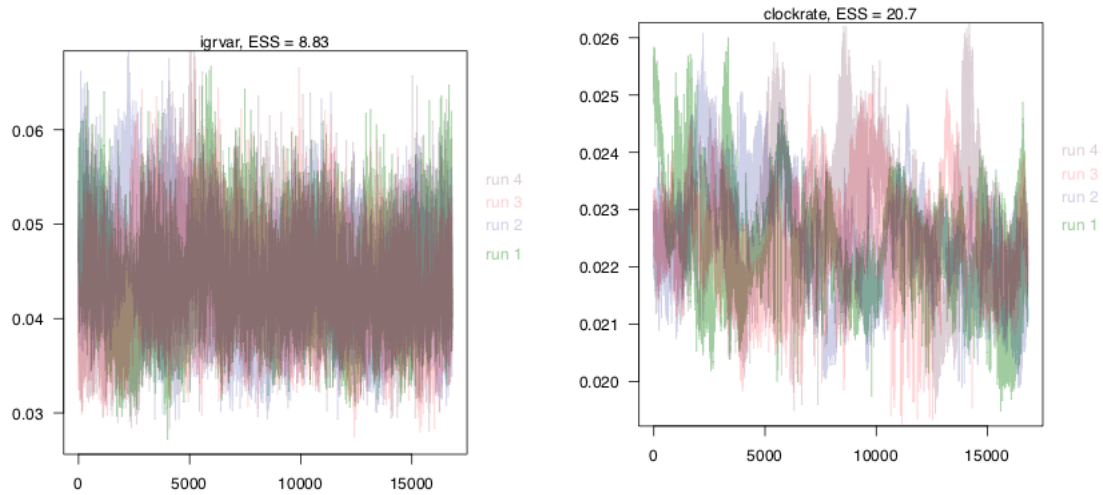

624

625 **S4.6** Convergence statistics for the co-estimation of time and topology analyses. Traces and

626 ESS (after 20,000,000) clearly indicate that the analysis is still far from convergence.

627

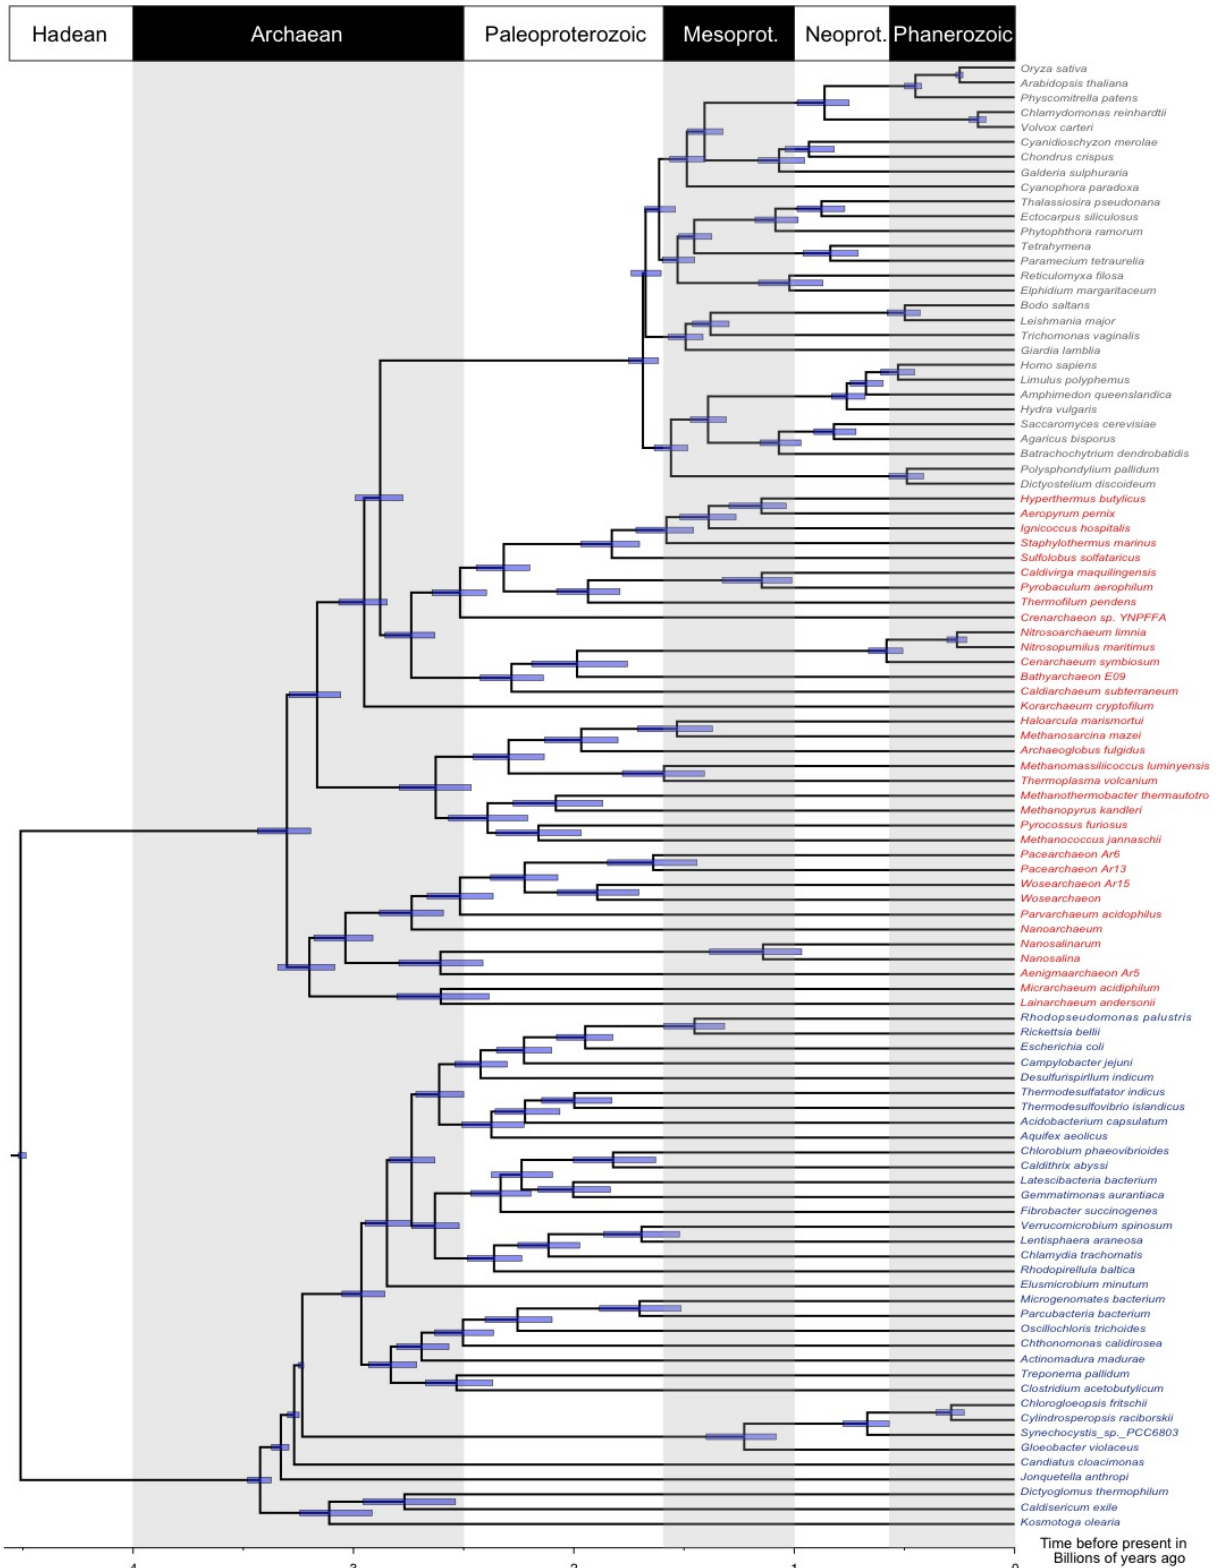

628  
629

630 **S4.7.** Divergence times produced using a Cauchy 50% calibration density distribution and an  
 631 uncorrelated clock model with the Asgardarchaeota removed. The Eukaryota are highlighted  
 632 in grey, the Archaeobacteria in red and the Eubacteria in blue.

633  
634  
635  
636  
637  
638  
639  
640  
641  
642  
643  
644  
645  
646  
647  
648  
649  
650  
651  
652  
653  
654  
655  
656  
657

1 Nelson, D. R. 178042: altered volcanoclastic sandstone, Table Top Well;  
Geochronology dataset 564; in Compilation of geochronology data, June 2007 update:  
Geological Survey of Western Australia. (2005).

2 Hanan, B. B. & Tilton, G. R. 60025: relict of primitive lunar crust? *Earth and  
Planetary Science Letters* **84**, 15-21 (1987).

3 Barboni, M. *et al.* Early formation of the Moon 4.51 billion years ago. *Science  
Advances* **3** (2017).

4 Pflug, H. D. & Jaeschke-Boyer, H. Combined structural and chemical analysis of  
3,800-Myr-old microfossils. *Nature* **280**, 483-486 (1979).

5 Dodd, M. S. *et al.* Evidence for early life in Earth's oldest hydrothermal vent  
precipitates. *Nature* **543**, 60-64 (2017).

6 Nutman, A. P., Bennett, V. C., Friend, C. R. L., Van Kranendonk, M. J. & Chivas, A.  
R. Rapid emergence of life shown by discovery of 3,700-million-year-old microbial  
structures. *Nature* **537**, 535-538 (2016).

7 Rosing, M. T. <sup>13</sup>C-Depleted Carbon Microparticles in >3700-Ma Sea-Floor  
Sedimentary Rocks from West Greenland. *Science* **283**, 674-676 (1999).

8 Mojzsis, S. J. *et al.* Evidence for life on Earth before 3,800 million years ago. *Nature*  
**384**, 55 (1996).

9 Schidlowski, M. A 3,800-million-year isotopic record of life from carbon in  
sedimentary rocks. *Nature* **333**, 313-318 (1988).

10 van Zuilen, M. A., Lepland, A. & Arrhenius, G. Reassessing the evidence for the  
earliest traces of life. *Nature* **418**, 627-630 (2002).

- 658 11 van Zuilen, M. A. *et al.* Graphite and carbonates in the 3.8 Ga old Isua Supracrustal  
659 Belt, southern West Greenland. *Precambrian Research* **126**, 331-348 (2003).
- 660 12 Lepland, A., Arrhenius, G. & Cornell, D. Apatite in early Archean Isua supracrustal  
661 rocks, southern West Greenland: its origin, association with graphite and potential as  
662 a biomarker. *Precambrian Research* **118**, 221-241 (2002).
- 663 13 Horita, J. & Berndt, M. E. Abiogenic Methane Formation and Isotopic Fractionation  
664 Under Hydrothermal Conditions. *Science* **285**, 1055-1057 (1999).
- 665 14 Sherwood Lollar, B., Westgate, T. D., Ward, J. A., Slater, G. F. & Lacrampe-  
666 Couloume, G. Abiogenic formation of alkanes in the Earth's crust as a minor source  
667 for global hydrocarbon reservoirs. *Nature* **416**, 522-524 (2002).
- 668 15 Shen, Y., Buick, R. & Canfield, D. E. Isotopic evidence for microbial sulphate  
669 reduction in the early Archean era. *Nature* **410**, 77-81 (2001).
- 670 16 Schopf, J. W. Microfossils of the Early Archean Apex Chert: New Evidence of the  
671 Antiquity of Life. *Science* **260**, 640-646 (1993).
- 672 17 Buick, R. Microfossil Recognition in Archean Rocks: An Appraisal of Spheroids and  
673 Filaments from a 3500 M.Y. Old Chert-Barite Unit at North Pole, Western Australia.  
674 *PALAIOS* **5**, 441-459 (1990).
- 675 18 Ueno, Y., Maruyama, S., Isozaki, Y. & Yurimoto, H. Early Archean (ca. 3.5 Ga)  
676 microfossils and <sup>13</sup>C-depleted carbonaceous matter in the North Pole area, Western  
677 Australia: Field occurrence and geochemistry. *Geochemistry and the Origin of Life*,  
678 203-236 (2001).
- 679 19 Brasier, M. D. *et al.* Questioning the evidence for Earth's oldest fossils. *Nature* **416**,  
680 76-81 (2002).

- 681 20 Brasier, M. D. *et al.* Critical testing of Earth's oldest putative fossil assemblage from  
682 the ~3.5 Ga Apex chert, Chinaman Creek, Western Australia. *Precambrian Research*  
683 **140**, 55-102 (2005).
- 684 21 Runnegar, B., Dollase, W. A., Ketcham, R. A., Colbert, M. & Carlson, W. D. in *Geol.*  
685 *Soc. Am. Abstracts with Programs*.
- 686 22 Engel, A. E. J. *et al.* Alga-Like Forms in Onverwacht Series, South Africa: Oldest  
687 Recognized Lifelike Forms on Earth. *Science* **161**, 1005-1008 (1968).
- 688 23 Walsh, M. M. & Lowe, D. R. Filamentous microfossils from the 3,500-Myr-old  
689 Onverwacht Group, Barberton Mountain Land, South Africa. *Nature* **314**, 530-532  
690 (1985).
- 691 24 Westall, F. *et al.* Early Archean fossil bacteria and biofilms in hydrothermally-  
692 influenced sediments from the Barberton greenstone belt, South Africa. *Precambrian*  
693 *Research* **106**, 93-116 (2001).
- 694 25 Westall, F. *et al.* Implications of a 3.472–3.333 Gyr-old subaerial microbial mat from  
695 the Barberton greenstone belt, South Africa for the UV environmental conditions on  
696 the early Earth. *Philosophical Transactions of the Royal Society B: Biological*  
697 *Sciences* **361**, 1857-1876 (2006).
- 698 26 Allwood, A. C., Walter, M. R., Kamber, B. S., Marshall, C. P. & Burch, I. W.  
699 Stromatolite reef from the Early Archaean era of Australia. *Nature* **441**, 714-718  
700 (2006).
- 701 27 Allwood, A. C., Walter, M. R., Burch, I. W. & Kamber, B. S. 3.43 billion-year-old  
702 stromatolite reef from the Pilbara Craton of Western Australia: Ecosystem-scale  
703 insights to early life on Earth. *Precambrian Research* **158**, 198-227 (2007).



- 704 28 Byerly, G. R., Lower, D. R. & Walsh, M. M. Stromatolites from the 3,300-3,500-Myr  
705 Swaziland Supergroup, Barberton Mountain Land, South Africa. *Nature* **319**, 489-491  
706 (1986).
- 707 29 Hofmann, H. J., Grey, K., Hickman, A. H. & Thorpe, R. I. Origin of 3.45 Ga  
708 coniform stromatolites in Warrawoona Group, Western Australia. *Geological Society  
709 of America Bulletin* **111**, 1256-1262 (1999).
- 710 30 Walter, M. R., Buick, R. & Dunlop, J. S. R. Stromatolites 3,400-3,500 Myr old from  
711 the North Pole area, Western Australia. *Nature* **284**, 443-445 (1980).
- 712 31 Van Kranendonk, M. J. Volcanic degassing, hydrothermal circulation and the  
713 flourishing of early life on Earth: A review of the evidence from c. 3490-3240 Ma  
714 rocks of the Pilbara Supergroup, Pilbara Craton, Western Australia. *Earth-Science  
715 Reviews* **74**, 197-240 (2006).
- 716 32 McLoughlin, N., Wilson, L. A. & Brasier, M. D. Growth of synthetic stromatolites  
717 and wrinkle structures in the absence of microbes – implications for the early fossil  
718 record. *Geobiology* **6**, 95-105 (2008).
- 719 33 Lowe, D. R. Abiological origin of described stromatolites older than 3.2 Ga. *Geology*  
720 **22**, 387-390 (1994).
- 721 34 Javaux, E. J., Marshall, C. P. & Bekker, A. Organic-walled microfossils in 3.2-  
722 billion-year-old shallow-marine siliciclastic deposits. *Nature* **463**, 934-938 (2010).
- 723 35 Dworkin, M., Falkow, S., Rosenberg, E., Schleifer, K.-H. & Stackebrandt, E. *The  
724 Prokaryotes*. 3rd edn edn, 1156-1163, 31-115 (Springer, 2006).
- 725 36 Sugitani, K. *et al.* Early evolution of large micro-organisms with cytological  
726 complexity revealed by microanalyses of 3.4 Ga organic-walled microfossils.  
727 *Geobiology* **13**, 507-521 (2015).

- 728 37 Sugitani, K. *et al.* Biogenicity of morphologically diverse carbonaceous  
729 microstructures from the ca. 3400 Ma Strelley Pool Formation, in the Pilbara Craton,  
730 Western Australia. *Astrobiology* **10**, 899-920 (2010).
- 731 38 Sugitani, K., Mimura, K., Nagaoka, T., Lepot, K. & Takeuchi, M. Microfossil  
732 assemblage from the 3400 Ma Strelley Pool Formation in the Pilbara Craton, Western  
733 Australia: Results from a new locality. *Precambrian Research* **226**, 59-74 (2013).
- 734 39 Wacey, D., Kilburn, M. R., Saunders, M., Cliff, J. & Brasier, M. D. Microfossils of  
735 sulphur-metabolizing cells in 3.4-billion-year-old rocks of Western Australia. *Nature*  
736 *Geosci* **4**, 698-702 (2011).
- 737 40 Wacey, D., McLoughlin, N., Whitehouse, M. J. & Kilburn, M. R. Two coexisting  
738 sulfur metabolisms in a ca. 3400 Ma sandstone. *Geology* **38**, 1115-1118 (2010).
- 739 41 Duda, J.-P. *et al.* A Rare Glimpse of Paleoarchean Life: Geobiology of an  
740 Exceptionally Preserved Microbial Mat Facies from the 3.4 Ga Strelley Pool  
741 Formation, Western Australia. *PLOS ONE* **11**, e0147629, (2016).
- 742 42 Wacey, D. Stromatolites in the~ 3400 Ma Strelley Pool Formation, Western Australia:  
743 examining biogenicity from the macro-to the nano-scale. *Astrobiology* **10**, 381-395  
744 (2010).
- 745 43 Lepot, K. *et al.* Texture-specific isotopic compositions in 3.4 Gyr old organic matter  
746 support selective preservation in cell-like structures. *Geochimica et Cosmochimica*  
747 *Acta* **112**, 66-86 (2013).
- 748 44 Sugitani, K. *et al.* A Paleoarchean coastal hydrothermal field inhabited by diverse  
749 microbial communities: the Strelley Pool Formation, Pilbara Craton, Western  
750 Australia. *Geobiology* **13**, 522-545, (2015).
- 751 45 Hickman, A. Regional review of the 3426–3350 Ma Strelley Pool Formation, Pilbara  
752 Craton, Western Australia. *West Australia Geolog Surv Rec* **2008**, 15 (2008).

753 46 Ryder, G. Mass flux in the ancient Earth-Moon system and benign implications for  
754 the origin of life on Earth. *Journal of Geophysical Research: Planets* **107**, 6-1-6-13  
755 (2002).

756 47 Valley, J. W., Peck, W. H., King, E. M. & Wilde, S. A. A cool early Earth. *Geology*  
757 **30**, 351-354 (2002).

758 48 Abramov, O. & Mojzsis, S. J. Microbial habitability of the Hadean Earth during the  
759 late heavy bombardment. *Nature* **459**, 419-422 (2009).

760 49 Koeberl, C. Impact processes on the early Earth. *Elements* **2**, 211-216 (2006).

761 50 Kleine, T., Palme, H., Mezger, K. & Halliday, A. N. Hf-W Chronometry of Lunar  
762 Metals and the Age and Early Differentiation of the Moon. *Science* **310**, 1671-1674  
763 (2005).

764 51 Carlson, R. W. & Lugmair, G. W. The age of ferroan anorthosite 60025: oldest crust  
765 on a young Moon? *Earth and Planetary Science Letters* **90**, 119-130 (1988).

766 52 Bottke, W. F. *et al.* Dating the Moon-forming impact event with asteroidal meteorites.  
767 *Science* **348**, 321-323 (2015).

768 53 Jacobson, S. A. *et al.* Highly siderophile elements in Earth's mantle as a clock for the  
769 Moon-forming impact. *Nature* **508**, 84-87 (2014).

770 54 Tera, F., Papanastassiou, D. & Wasserburg, G. in *Lunar and Planetary Science*  
771 *Conference*.

772 55 Halliday, A., Rehkämper, M., Lee, D.-C. & Yi, W. Early evolution of the Earth and  
773 Moon: new constraints from Hf-W isotope geochemistry. *Earth and Planetary*  
774 *Science Letters* **142**, 75-89 (1996).

775 56 Halliday, A. N. A young Moon-forming giant impact at 70–110 million years  
776 accompanied by late-stage mixing, core formation and degassing of the Earth.

777 *Philosophical Transactions of the Royal Society A: Mathematical, Physical and*  
778 *Engineering Sciences* **366**, 4163-4181 (2008).

779 57 Kleine, T., Munker, C., Mezger, K. & Palme, H. Rapid accretion and early core  
780 formation on asteroids and the terrestrial planets from Hf-W chronometry. *Nature*  
781 **418**, 952-955 (2002).

782 58 Touboul, M., Kleine, T., Bourdon, B., Palme, H. & Wieler, R. Late formation and  
783 prolonged differentiation of the Moon inferred from W isotopes in lunar metals.  
784 *Nature* **450**, 1206-1209 (2007).

785 59 Halliday, A. The origin and earliest history of the Earth. *Planets, Asteroids, Comets*  
786 *and The Solar System*, 149-211 (2014).

787 60 Kamo, S. L. & Davis, D. W. Reassessment of Archean crustal development in the  
788 Barberton Mountain Land, South Africa, based on U-Pb dating. *Tectonics* **13**, 167-  
789 192 (1994).

790 61 Cairns-Smith, A. G. Precambrian solution photochemistry, inverse segregation, and  
791 banded iron formations. *Nature* **276**, 807-808 (1978).

792 62 Crowe, S. A. *et al.* Photoferrotrophs thrive in an Archean Ocean analogue.  
793 *Proceedings of the National Academy of Sciences* **105**, 15938-15943 (2008).

794 63 Konhauser, K. O. *et al.* Could bacteria have formed the Precambrian banded iron  
795 formations? *Geology* **30**, 1079-1082 (2002).

796 64 Grotzinger, J. P. & Rothman, D. H. An abiotic model for stromatolite morphogenesis.  
797 *Nature* **383**, 423-425 (1996).

798 65 Satkoski, A. M., Beukes, N. J., Li, W., Beard, B. L. & Johnson, C. M. A redox-  
799 stratified ocean 3.2 billion years ago. *Earth and Planetary Science Letters* **430**, 43-53  
800 (2015).

801 66 Olson, S. L., Kump, L. R. & Kasting, J. F. Quantifying the areal extent and dissolved  
802 oxygen concentrations of Archean oxygen oases. *Chemical Geology* **362**, 35-43  
803 (2013).

804 67 Homann, M., Heubeck, C., Airo, A. & Tice, M. M. Morphological adaptations of 3.22  
805 Ga-old tufted microbial mats to Archean coastal habitats (Moodies Group, Barberton  
806 Greenstone Belt, South Africa). *Precambrian Research* **266**, 47-64 (2015).

807 68 Anbar, A. D. *et al.* A Whiff of Oxygen Before the Great Oxidation Event? *Science*  
808 **317**, 1903-1906 (2007).

809 69 Crowe, S. A. *et al.* Atmospheric oxygenation three billion years ago. *Nature* **501**, 535-  
810 538 (2013).

811 70 Kendall, B. *et al.* Pervasive oxygenation along late Archaean ocean margins. *Nature*  
812 *Geosci* **3**, 647-652 (2010).

813 71 Czaja, A. D. *et al.* Evidence for free oxygen in the Neoproterozoic ocean based on  
814 coupled iron–molybdenum isotope fractionation. *Geochimica et Cosmochimica Acta*  
815 **86**, 118-137 (2012).

816 72 Planavsky, N. J. *et al.* Evidence for oxygenic photosynthesis half a billion years  
817 before the Great Oxidation Event. *Nature Geosci* **7**, 283-286 (2014).

818 73 Riding, R., Fralick, P. & Liang, L. Identification of an Archean marine oxygen oasis.  
819 *Precambrian Research* **251**, 232-237 (2014).

820 74 Byerly, G. R., Kröner, A., Lowe, D. R., Todt, W. & Walsh, M. M. Prolonged  
821 magmatism and time constraints for sediment deposition in the early Archean  
822 Barberton greenstone belt: evidence from the Upper Onverwacht and Fig Tree groups.  
823 *Precambrian Research* **78**, 125-138 (1996).

824 75 Li, H. *et al.* Recent advances in the study of the Mesoproterozoic geochronology in  
825 the North China Craton. *Journal of Asian Earth Sciences* **72**, 216-227, (2013).

- 826 76 Peng, Y., Bao, H. & Yuan, X. New morphological observations for Paleoproterozoic  
827 acritarchs from the Chuanlinggou Formation, North China. *Precambrian Research*  
828 **168**, 223-232 (2009).
- 829 77 Lamb, D. M., Awramik, S. M., Chapman, D. J. & Zhu, S. Evidence for eukaryotic  
830 diversification in the~ 1800 million-year-old Changzhougou Formation, North China.  
831 *Precambrian Research* **173**, 93-104 (2009).
- 832 78 MoczydŁowska, M., Landing, E. D., Zang, W. & Palacios, T. Proterozoic  
833 phytoplankton and timing of Chlorophyte algae origins. *Palaeontology* **54**, 721-733  
834 (2011).
- 835 79 Zhu, S. *et al.* Decimetre-scale multicellular eukaryotes from the 1.56-billion-year-old  
836 Gaoyuzhuang Formation in North China. *Nature Communications* **7**, 11500 (2016).
- 837 80 Horodyski, R. J. Problematic Bedding-Plane Markings from the Middle Proterozoic  
838 Appekunny Argillite, Belt Supergroup, Northwestern Montana. *Journal of*  
839 *Paleontology* **56**, 882-889 (1982).
- 840 81 Yin, L.-m. Acanthomorphic acritarchs from Meso-Neoproterozoic shales of the  
841 Ruyang Group, Shanxi, China. *Review of Palaeobotany and Palynology* **98**, 15-25  
842 (1997).
- 843 82 Knoll, A. H., Javaux, E. J., Hewitt, D. & Cohen, P. Eukaryotic organisms in  
844 Proterozoic oceans. *Philosophical Transactions of the Royal Society B: Biological*  
845 *Sciences* **361**, 1023-1038 (2006).
- 846 83 Cohen, P. A. & Macdonald, F. A. The Proterozoic Record of Eukaryotes.  
847 *Paleobiology* **41**, 610-632 (2015).
- 848 84 Knoll, A. H. Paleobiological perspectives on early eukaryotic evolution. *Cold Spring*  
849 *Harbor Perspectives in Biology* **6**, a016121 (2014).

850 85 Lu, S., Yang, C. & Zhu, S. in *Proceedings of the 30th International Geological*  
851 *Congress, Geological Publishing House, Beijing.* 13-T105.

852 86 Turner, E. C. & Kamber, B. S. Arctic Bay Formation, Borden Basin, Nunavut  
853 (Canada): Basin evolution, black shale, and dissolved metal systematics in the  
854 Mesoproterozoic ocean. *Precambrian Research* **208–211**, 1-18 (2012).

855 87 Bengtson, S. *et al.*, Three-dimensional preservation of cellular and subcellular  
856 structures suggests 1.6 billion-year-old crown-group red algae. *PLOS Biology*, **15**,  
857 e2000735, (2017).

858 88 Butterfield, N. J., Knoll, A. H. & Swett, K. A bangiophyte red alga from the  
859 Proterozoic of arctic Canada. *Science* **250**, 104-108 (1990).

860 89 Butterfield, N. J. *Bangiomorpha pubescens* n. gen., n. sp.: implications for the  
861 evolution of sex, multicellularity, and the Mesoproterozoic/Neoproterozoic radiation  
862 of eukaryotes. *Paleobiology* **26** (2000).

863 90 Parfrey, L. W., Lahr, D. J. G., Knoll, A. H. & Katz, L. A. Estimating the timing of  
864 early eukaryotic diversification with multigene molecular clocks. *Proceedings of the*  
865 *National Academy of Sciences* **108**, 13624-13629 (2011).

866 91 Eme, L., Sharpe, S. C., Brown, M. W. & Roger, A. J. On the age of eukaryotes:  
867 evaluating evidence from fossils and molecular clocks. *Cold Spring Harb. Perspect.*  
868 *Biol.* **6**, a016139 (2014).

869 92 Hoek, C., Mann, D. & Jahns, H. M. *Algae: an introduction to phycology*. (Cambridge  
870 university press, 1995).

871 93 Lee, R. E. *Phycology*. (Cambridge University Press, 2008).

872 94 Yang, E. C. *et al.* Divergence time estimates and the evolution of major lineages in  
873 the florideophyte red algae. *Scientific Reports* **6**, 21361 (2016).

- 874 95 Heaman, L., LeCheminant, A. & Rainbird, R. in *Geological Association of Canada,*  
875 *Programs with Abstracts.* A55.
- 876 96 LeCheminant, A. N. & Heaman, L. M. Mackenzie igneous events, Canada: Middle  
877 Proterozoic hotspot magmatism associated with ocean opening. *Earth and Planetary*  
878 *Science Letters* **96**, 38-48 (1989).
- 879 97 Kah, L. C., Sherman, A. G., Narbonne, G. M., Knoll, A. H. & Kaufman, A. J.  $\delta^{13}\text{C}$   
880 stratigraphy of the Proterozoic Bylot Supergroup, Baffin Island, Canada: implications  
881 for regional lithostratigraphic correlations. *Canadian Journal of Earth Sciences* **36**,  
882 313-332 (1999).
- 883 98 Mayr, U. *Geology of Eastern Prince of Wales Island and Adjacent Smaller Islands,*  
884 *Nunavut (parts of NTS 68D, Baring Channel and 68A, Fisher Lake).* Vol. 574  
885 (Geological Survey of Canada, 2004).
- 886 99 Long, D. G. F. & Turner, E. C. Tectonic, sedimentary and metallogenic re-evaluation  
887 of basal strata in the Mesoproterozoic Bylot basins, Nunavut, Canada: Are  
888 unconformity-type uranium concentrations a realistic expectation? *Precambrian*  
889 *Research* **214–215**, 192-209 (2012).
- 890 100 Zhongying, Z. Clastic facies microfossils from the Chuanlinggou Formation (1800  
891 Ma) near Jixian, North China. *Journal of Micropalaeontology* **5**, 9-16 (1986).
- 892 101 Roger, A. J., Muñoz-Gómez, S. A. & Kamikawa, R. The Origin and Diversification of  
893 Mitochondria. *Current Biology* **27**, R1177-R1192, (2017).
- 894 102 Williams, K. P., Sobral, B. W. & Dickerman, A. W. A robust species tree for the  
895 alphaproteobacteria. *Journal of bacteriology* **189**, 4578-4586 (2007).
- 896 103 Wang, Z. & Wu, M. An integrated phylogenomic approach toward pinpointing the  
897 origin of mitochondria. *Scientific Reports* **5**, 7949 (2015).



898 104 Atteia, A. *et al.* A Proteomic Survey of *Chlamydomonas reinhardtii* Mitochondria  
899 Sheds New Light on the Metabolic Plasticity of the Organelle and on the Nature of  
900 the  $\alpha$ -Proteobacterial Mitochondrial Ancestor. *Molecular Biology and Evolution* **26**,  
901 1533-1548 (2009).

902 105 Esser, C. *et al.* A Genome Phylogeny for Mitochondria Among  $\alpha$ -Proteobacteria and  
903 a Predominantly Eubacterial Ancestry of Yeast Nuclear Genes. *Molecular Biology*  
904 *and Evolution* **21**, 1643-1660 (2004).

905 106 Gray, M. W. Mosaic nature of the mitochondrial proteome: Implications for the origin  
906 and evolution of mitochondria. *Proceedings of the National Academy of Sciences* **112**,  
907 10133-10138 (2015).

908 107 Gray, M. W. Mitochondrial evolution. *Cold Spring Harb. Perspec. Biol.* **4**, a011403  
909 (2012).

910 108 Shih, P. M. & Matzke, N. J. Primary endosymbiosis events date to the later  
911 Proterozoic with cross-calibrated phylogenetic dating of duplicated ATPase  
912 proteins. *Proceedings of the National Academy of Sciences* **110**, 12355-12360,  
913 (2013).

914 109 Schopf, J. W. Fossil evidence of Archaean life. *Philosophical Transactions of the*  
915 *Royal Society B: Biological Sciences* **361**, 869-885, (2006).

916 110 Brasier, M., McLoughlin, N., Green, O. & Wacey, D. A fresh look at the fossil  
917 evidence for early Archaean cellular life. *Philosophical Transactions of the Royal*  
918 *Society B: Biological Sciences* **361**, 887-902, (2006)

919 111 Amard, B. & Bertrand-Sarfati, J. Microfossils in 2000 Ma old cherty stromatolites  
920 of the Franceville Group, Gabon. *Precambrian Research* **81**, 197-221, (1997).

921 112 Tomitani, A., Knoll, A. H., Cavanaugh, C. M. & Ohno, T. The evolutionary  
922 diversification of cyanobacteria: Molecular–phylogenetic and paleontological

923 perspectives. *Proceedings of the National Academy of Sciences* **103**, 5442-5447,  
924 (2006).

925 113 Butterfield, N. J. Proterozoic photosynthesis – a critical review. *Palaeontology* **58**,  
926 953-972, (2015).

927 114 Golubic, S. & Hofmann, H. J. Comparison of Holocene and Mid-Precambrian  
928 Entophysalidaceae (Cyanophyta) in Stromatolitic Algal Mats: Cell Division and  
929 Degradation. *Journal of Paleontology* **50**, 1074-1082 (1976).

930 115 Hofmann, H. J. Precambrian Microflora, Belcher Islands, Canada: Significance and  
931 Systematics. *Journal of Paleontology* **50**, 1040-1073 (1976).

932 116 Sánchez-Baracaldo, P., Raven, J. A., Pisani, D. & Knoll, A. H. Early photosynthetic  
933 eukaryotes inhabited low-salinity habitats. *Proceedings of the National Academy*  
934 *of Sciences* **114**, E7737-E7745, (2017).

935 117 Ponce-Toledo, R. I. *et al.* An Early-Branching Freshwater Cyanobacterium at the  
936 Origin of Plastids. *Current Biology* **27**, 386-391 (2017).

937 118 Ochoa de Alda, J. A. G., Esteban, R., Diago, M. L. & Houmard, J. The plastid  
938 ancestor originated among one of the major cyanobacterial lineages. *Nature*  
939 *Communications* **5**, 4937 (2014).

940 119 Deusch, O. *et al.* Genes of Cyanobacterial Origin in Plant Nuclear Genomes Point to a  
941 Heterocyst-Forming Plastid Ancestor. *Molecular Biology and Evolution* **25**, 748-761  
942 (2008).

943 120 Gradstein, F. M., Ogg, J. G., Schmitz, M. & Ogg, G. *The geologic time scale 2012*.  
944 (elsevier, 2012).

945 121 Taylor, T. N., Hass, H. & Kerp, H. The oldest fossil ascomycetes. *Nature* **399**, 648-  
946 648 (1999).

- 947 122 Taylor, T. N., Hass, H., Kerp, H., Krings, M. & Hanlin, R. T. Perithecial  
948 Ascomycetes from the 400 Million Year Old Rhynie Chert: An Example of Ancestral  
949 Polymorphism. *Mycologia* **96**, 1403-1419 (2004).
- 950 123 Butterfield, N. J. Probable Proterozoic fungi. *Paleobiology* **31**, 165-182 (2005).
- 951 124 Butterfield, N. J. Early evolution of the Eukaryota. *Palaeontology* **58**, 5-17 (2015).
- 952 125 Yuan, X., Xiao, S. & Taylor, T. N. Lichen-Like Symbiosis 600 Million Years Ago.  
953 *Science* **308**, 1017-1020 (2005).
- 954 126 Cunningham, J. A. *et al.* Distinguishing geology from biology in the Ediacaran  
955 Doushantuo biota relaxes constraints on the timing of the origin of bilaterians.  
956 *Proceedings of the Royal Society B: Biological Sciences* **279**, 2369-2376, (2012).
- 957 127 Redecker, D., Kodner, R. & Graham, L. E. Glomalean fungi from the Ordovician.  
958 *Science* **289**, 1920-1921 (2000).
- 959 128 Bengtson, S. *et al.* Fungus-like mycelial fossils in 2.4-billion-year-old vesicular  
960 basalt. *Nature Ecology & Evolution* **1**, 0141 (2017).
- 961 129 Schumann, G., Manz, W., Reitner, J. & Lustrino, M. Ancient Fungal Life in North  
962 Pacific Eocene Oceanic Crust. *Geomicrobiology Journal* **21**, 241-246 (2004).
- 963 130 Ivarsson, M., Bengtson, S., Skogby, H., Belivanova, V. & Marone, F. Fungal colonies  
964 in open fractures of subseafloor basalt. *Geo-Marine Letters* **33**, 233-243 (2013).
- 965 131 Ivarsson, M. *et al.* Fossilized fungi in subseafloor Eocene basalts. *Geology* **40**, 163-  
966 166 (2012).
- 967 132 Mark, D. F. *et al.*  $^{40}\text{Ar}/^{39}\text{Ar}$  dating of hydrothermal activity, biota and gold  
968 mineralization in the Rhynie hot-spring system, Aberdeenshire, Scotland. *Geochimica*  
969 *et Cosmochimica Acta* **75**, 555-569 (2011).

- 970 133 Parry, S., Noble, S., Crowley, Q. & Wellman, C. A high-precision U–Pb age  
971 constraint on the Rhynie Chert Konservat-Lagerstätte: time scale and other  
972 implications. *Journal of the Geological Society* **168**, 863-872 (2011).
- 973 134 Rice, C. & Ashcroft, W. The geology of the northern half of the Rhynie Basin,  
974 Aberdeenshire, Scotland. *Transactions of the Royal Society of Edinburgh: Earth  
975 Sciences* **94**, 299-308 (2003).
- 976 135 Parry, S., Noble, S., Crowley, Q. & Wellman, C. Reply to Discussion on ‘A high-  
977 precision U–Pb age constraint on the Rhynie Chert Konservat-Lagerstätte: time scale  
978 and other implications’ *Journal*, 168, 863–872. *Journal of the Geological Society* **170**,  
979 703-706 (2013).
- 980 136 Wellman, C. H. Spore assemblages from the Lower Devonian ‘Lower Old Red  
981 Sandstone’ deposits of the Rhynie outlier, Scotland. *Transactions of the Royal Society  
982 of Edinburgh: Earth Sciences* **97**, 167-211 (2006).
- 983 137 Bosak, T. *et al.* Possible early foraminiferans in post-Sturtian (716– 635 Ma) cap  
984 carbonates. *Geology* **40**, 67-70 (2012).
- 985 138 Bosak, T. *et al.* Agglutinated tests in post-Sturtian cap carbonates of Namibia and  
986 Mongolia. *Earth and Planetary Science Letters* **308**, 29-40 (2011).
- 987 139 Antcliffe, J. B., Gooday, A. J. & Brasier, M. D. Testing the protozoan hypothesis for  
988 Ediacaran fossils: a developmental analysis of *Palaeopascichnus*. *Palaeontology* **54**,  
989 1157-1175 (2011).
- 990 140 Culver, S. J. Early Cambrian foraminifera from west Africa. *Science* **254**, 689-692  
991 (1991).
- 992 141 McIlroy, D., Green, O. R. & Brasier, M. D. Palaeobiology and evolution of the  
993 earliest agglutinated Foraminifera: *Platysolenites*, *Spirosolenites* and related forms.  
994 *Lethaia* **34**, 13-29 (2001).

- 995 142 Villeneuve, M., Theveniaut, H., Ndiaye, P. M. & Retière, S. Re-assessment of the  
996 northern Guinean “Koubia–Lessere unconformity”(KLU): Consequences on the  
997 geological correlations throughout West Africa. *Comptes Rendus Geoscience* **346**,  
998 262-272 (2014).
- 999 143 Rozanov, A. Y. Platysolenites. *Upper Precambrian and Cambrian palaeontology of*  
1000 *the East-European platform*, 94-100 (1983).
- 1001 144 Rozanov, A. Y. & Zhuravlev, A. Y. in *Origin and early evolution of the Metazoa*  
1002 205-282 (Springer, 1992).
- 1003 145 Lipps, J. Proterozoic and Cambrian skeletonized protists. *The Proterozoic Biosphere*,  
1004 237-240 (1992).
- 1005 146 Lipps, J. Origin and early evolution of Foraminifera. *Studies in benthic Foraminifera*  
1006 **90**, 3-9 (1992).
- 1007 147 Lipps, J. & Rozanov, A. Y. The late Precambrian-Cambrian agglutinated fossil  
1008 Platysolenites. *Paleontological Journal of Paleontologicheskii Zhurnal* **30**, 679-687  
1009 (1996).
- 1010 148 Porter, S. M. & Knoll, A. H. Testate amoebae in the Neoproterozoic Era: evidence  
1011 from vase-shaped microfossils in the Chuar Group, Grand Canyon. *Paleobiology* **26**,  
1012 360-385 (2000).
- 1013 149 Clark, J. W. & Donoghue, P. C. J. Constraining the timing of whole genome  
1014 duplication in plant evolutionary history. *Proceedings of the Royal Society B:*  
1015 *Biological Sciences* **284**, (2017).
- 1016 150 Benton, M. J. *et al.* Constraints on the timescale of animal evolutionary history.  
1017 *Palaeontologia Electronica* **18**, 1-106 (2015).

1018 151 Aberer, A. J., Krompass, D. & Stamatakis, A. Pruning Rogue Taxa Improves  
1019 Phylogenetic Accuracy: An Efficient Algorithm and Webservice. *Systematic Biology*  
1020 **62**, 162-166 (2013).

1021 152 Ronquist, F., *et al.* MrBayes 3.2: efficient Bayesian phylogenetic inference and model  
1022 choice across a large model space. *Systematic biology* **61**, 539-542 (2012).

1023 153 Lepage, T., *et al.* A general comparison of relaxed molecular clock  
1024 models. *Molecular biology and evolution* **24**, 2669-2680 (2007).

1025 154 Rannala, B. Conceptual issues in Bayesian divergence time estimation. *Philos Trans*  
1026 *R Soc Lond B Biol Sci.* **371**, 20150134 (2016).

1027 155 Donoghue P.C.J. and Yang Z. The evolution of methods for establishing evolutionary  
1028 timescales. *Philos Trans R Soc Lond B Biol Sci.* **371**, 20160020 (2016).

1029

1030
